1 **Title**

2 *Helicobacter pylori* diversification during chronic infection within a single host generates  
3 sub-populations with distinct phenotypes  
4

5  
6 **Short title**

7 *Helicobacter pylori* diversification within a single host

8 **Authors**

9 Laura K. Jackson<sup>1,2</sup>, Barney Potter<sup>3</sup>, Sean Schneider<sup>2</sup>, Matthew Fitzgibbon<sup>4</sup>, Kris  
10 Blair<sup>1,2</sup>, Hajirah Farah<sup>2,5</sup>, Uma Krishna<sup>6</sup>, Trevor Bedford<sup>2,3</sup>, Richard M. Peek Jr.<sup>6</sup>, Nina R.  
11 Salama<sup>1,2,5</sup>  
12

13 **Affiliations**

14 <sup>1</sup>*Molecular and Cellular Biology Graduate Program, University of Washington, Seattle, WA*  
15 <sup>2</sup>*Human Biology Division, Fred Hutchinson Cancer Research Center, Seattle, WA*  
16 <sup>3</sup>*Vaccine and Infectious Disease Division, Fred Hutchinson Cancer Research Center, Seattle,*  
17 *WA*  
18 <sup>4</sup>*Genomics & Bioinformatics Shared Resource, Fred Hutchinson Cancer Research Center,*  
19 *Seattle, WA*  
20 <sup>5</sup>*Department of Microbiology, University of Washington School of Medicine, Seattle, WA*  
21 <sup>6</sup>*Division of Gastroenterology, Department of Medicine, Vanderbilt University Medical Center,*  
22 *Nashville, TN*  
23  
24

25

26

27 **Abstract**

28 *Helicobacter pylori* chronically infects the stomach of approximately half of the world's  
29 population. Manifestation of clinical diseases associated with *H. pylori* infection,  
30 including cancer, is driven by strain properties and host responses; and as chronic  
31 infection persists, both are subject to change. Previous studies have documented  
32 frequent and extensive within-host bacterial genetic variation. To define how within-host  
33 diversity contributes to phenotypes related to *H. pylori* pathogenesis, this project  
34 leverages a collection of 39 clinical isolates acquired prospectively from a single subject  
35 at two time points and from multiple gastric sites. During the six years separating  
36 collection of these isolates, this individual, initially harboring a duodenal ulcer,  
37 progressed to gastric atrophy and concomitant loss of acid secretion. Whole genome  
38 sequence analysis identified 2,232 unique single nucleotide polymorphisms (SNPs)  
39 across isolates and a nucleotide substitution rate of  $1.3 \times 10^{-4}$  substitutions/site/year.  
40 Gene ontology analysis identified cell envelope genes among the genes with excess  
41 accumulation of nonsynonymous SNPs (nSNPs). A dendrogram based on genetic  
42 similarity, clusters isolates from each time point separately. Within time points, there is  
43 segregation of subgroups with phenotypic differences in bacterial morphology, ability to  
44 induce inflammatory cytokines, and mouse colonization. Higher inflammatory cytokine  
45 induction in recent isolates maps to shared polymorphisms in the Cag PAI protein,  
46 CagY, while rod morphology in a subgroup of recent isolates mapped to eight mutations  
47 in three distinct helical cell shape determining (*csd*) genes. The presence of subgroups  
48 with unique genetic and phenotypic properties suggest complex selective forces and  
49 multiple sub-niches within the stomach during chronic infection.

50

## 51 **Author Summary**

52 *Helicobacter pylori*, one of the most common bacterial pathogens colonizing humans, is  
53 the main agent responsible for stomach ulcers and cancer. Certain strain types are  
54 associated with increased risk of disease, however many factors contributing to disease  
55 outcome remain unknown. Prior work has documented genetic diversity among  
56 bacterial populations within single individuals, but the impact of this diversity for  
57 continued bacterial infection or disease progression remains understudied. In our  
58 analysis we examined both genetic and functional features of many stomach isolates  
59 from a single individual infected over six years. During these six years the subject  
60 shifted from having excess acid production and a duodenal ulcer to lower acid  
61 production from gastric atrophy. The 39 isolates form sub-populations based on gene  
62 sequence changes that accumulated in the different isolates. In addition to having  
63 distinguishing genetic features, these sub-populations also have differences in several  
64 bacterial properties, including cell shape, ability to activate immune responses, and  
65 colonization in a mouse model of infection. This apparent functional specialization  
66 suggests that the bacterial sub-populations may have adapted to distinct sub-niches  
67 within the stomach during chronic infection.

68

## 69 **Introduction**

70 *Helicobacter pylori* is a bacterial pathogen that colonizes the human gastric mucosa of  
71 approximately half of the world's population [1]. Infections persist throughout life without  
72 intervention and can lead to gastric and duodenal ulcers, MALT lymphoma, and gastric  
73 cancer in a subset of individuals [2,3]. *H. pylori* exhibits marked genetic diversity

74 compared to other bacterial pathogens, can impact treatment efficacy and disease  
75 severity [4–7]. Typically, antibiotics and proton pump inhibitors are employed for  
76 treatment, but variable prevalence of antibiotic resistance across populations make  
77 implementing a single treatment regimen difficult [8,9]. Strain-specific genotypes also  
78 contribute to increased disease risk within distinct ethno-geographic populations.  
79 Individuals with strains carrying the Cag pathogenicity island (Cag PAI), encoding a type  
80 IV secretion system (T4SS) and effector toxin CagA, have an increased risk of gastric  
81 cancer [10,11]. Cag PAI encoded genes, *cagA* and *cagY* exhibit significant allelic  
82 variation between individuals and have been identified as targets of positive selection  
83 within the global population [12]. Both CagA and CagY have been shown to modulate  
84 the host inflammatory response [13,14]. Recombination events within *cagY*, which  
85 encodes a structural component of the Cag T4SS with homology to the VirB10  
86 component of other T4S systems, modifies secretion of inflammatory cytokines from  
87 epithelial cells [15,16]. CagA alters host responses through its interaction with  
88 intracellular kinases leading to the activation of the NF $\kappa$ B pathway [17,18]. In addition to  
89 Cag PAI genes, certain alleles of vacuolating cytotoxin, *vacA*, and frequent phase  
90 variation as well as recombination mediated gain and loss of outer membrane protein  
91 (OMP) adhesins BabA, SabA, and HopQ, have been linked to strain differences in  
92 pathogenesis [19–22].

93         Several mechanisms promote genomic diversification. Although *H. pylori* does  
94 encode several transcriptional regulators, much of gene regulation occurs through  
95 genomic alterations [23]. *H. pylori* has several phase variable genes whose expression  
96 is altered due to slipped strand mispairing in homo-polymeric tracts [24,25]. In addition,

97 *H. pylori* has a somewhat elevated baseline mutation rate compared to other bacteria;  
98  $10^6$ - $10^8$  substitutions/site/generation compared to the  $10^9$  substitutions/site/generation  
99 reported for *Escherichia coli* [26–28]. This is due to absent mismatch repair genes and  
100 deficiencies in the exonuclease domain of PolI [29]. However, base-excision repair is  
101 robust, preventing hypermutator phenotypes [30]. Variation is largely driven by high  
102 rates of intra and inter-genomic recombination. Intragenomic recombination can alter  
103 protein expression via gene conversion among paralogous families of outer membrane  
104 proteins [25]. Additionally, as a naturally competent bacterium, *H. pylori* incorporates  
105 DNA from genetically distinct strains into its chromosome, further varying gene content  
106 and sequence [31,32].

107         The human stomach is the only known niche for *H. pylori*; therefore, the breadth  
108 of genomic diversity across global populations likely reflects adaptation to individual  
109 host stomach environments [33]. More recently, genetic diversity within a single host  
110 has also become appreciated, suggesting the existence of sub-niches within the  
111 stomach with distinct selective pressures [34–37]. *H. pylori* can colonize the epithelial  
112 surface of the inner gastric mucus layer, form cell adherent microcolonies, and  
113 penetrate into the gastric glands in both the antrum and corpus (Fig. 1) [38,39]. The  
114 antrum and corpus have distinct gland architecture and cell type composition, providing  
115 unique challenges to bacterial survival. Gastric environments also change during  
116 lifelong infection. While most acute infections start in the antrum where the pH is closer  
117 to neutral, *H. pylori* can expand into the corpus [40,41]. Changes in bacterial localization  
118 are associated with histologic changes, including loss of the parietal cells (gastric  
119 atrophy), a risk factor for the development of gastric cancer [42]. These changes are

120 accompanied by fluctuations in immune responses and alteration of glycosylation  
121 patterns affecting OMP-receptor binding to cell surface and mucus [24,43,44].

122         Prior studies of within-host genetic variation have observed signatures of  
123 diversifying selection in support of selective pressures during chronic stomach  
124 colonization [7,37,45]. However, phenotypic variation in infecting populations over time  
125 has not been well studied. To define both genetic changes that occur during infection  
126 and their functional consequences, we leveraged *H. pylori* isolates from a single  
127 individual collected at two time points spanning 6 years (1994-2000). One of multiple  
128 isolates obtained from culture of a single antral biopsy in 1994, J99, has previously  
129 been sequenced and a complete reference genome is available [46]. This same  
130 individual, who had not been successfully treated for *H. pylori*, underwent a repeat  
131 endoscopy performed in 2000 from which single biopsies from the corpus, antrum and  
132 gastric metaplasia in the duodenum were cultured and additional *H. pylori* isolates  
133 recovered. A subset of isolates from the second time point (yr 2000) were analyzed by  
134 PCR microarray as part of a study highlighting diversity of isolates from a single  
135 individual [34].

136         Here we combined whole genome sequence analysis of multiple isolates from  
137 this subject with extensive phenotypic characterization to explore the rates and extent of  
138 genetic and phenotypic diversification within a single host. In this individual, during six  
139 years of chronic colonization, isolates adapted to occupy at least two distinct niches  
140 within the stomach reflected by differential ability to colonize a mouse model. We  
141 identified the genetic basis for modulation of Cag-dependent inflammatory cytokine  
142 induction and morphologic diversification. Neither of these phenotypes fully account for

143 the differences in colonization of the mouse model, highlighting the multifactorial  
144 selection pressures operant during chronic stomach colonization.

145

146 **Results:**

147

148 **Whole genome sequencing detects within-host genetic diversification of bacterial**  
149 **populations.**

150 For this study we analyzed 39 isolates from two distinct sampling time points. At the  
151 time of the original biopsy (yr 1994), the source individual had a duodenal ulcer,  
152 indicative of *H. pylori* infection localized to the antrum and consistent with recovery of  
153 multiple single colonies from the single antral biopsy processed for culture. Six years  
154 later (yr 2000), after refusing antibiotic therapy, additional single colony isolates were  
155 collected from distinct biopsy sites. At this time, this individual had corpus predominant  
156 gastritis and signs of gastric atrophy, including decreased production of stomach acid,  
157 indicating the spread of infection to the main body of the stomach (Fig. 1) [34,47].

158 Twelve ancestral isolates, including *H. pylori* strain J99, were all collected in 1994 from  
159 the antral biopsy. From the second time point (recent, yr 2000), we analyzed 27 isolates  
160 from the antrum (n=12), corpus (n=12), and duodenum (n=3).

161

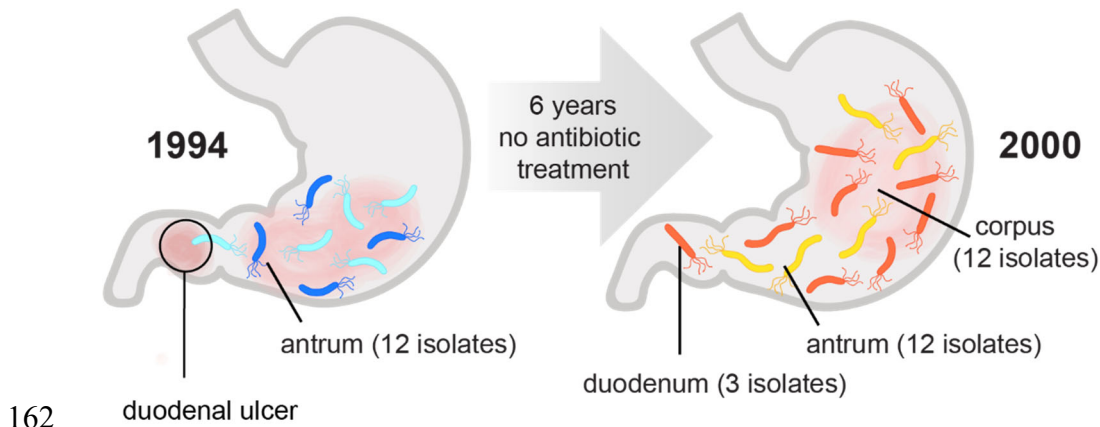

162

163 **Figure 1. Sampling utilized to characterize genetic and phenotypic diversification**

164 **of infecting population over six years.**

165 This study leverages a collection of *H. pylori* isolates obtained from a treatment-naïve  
166 subject initially presenting with a duodenal ulcer at two different time points over a 6-  
167 year period of infection. A total of 12 isolates were analyzed from a single antral biopsy  
168 in 1994, and a total of 27 isolates were analyzed from single corpus, antrum, and  
169 duodenum biopsies collected in 2000 as indicated. In 2000 the subject displayed corpus  
170 atrophic gastritis and elevated stomach pH.

171

172 In order to measure the genetic diversity of *H. pylori* populations both within each  
173 time point and between time points, we performed whole genome sequencing using  
174 Illumina MiSeq. Sequences were aligned using the published sequence of J99 as the  
175 reference (AE001439). All isolates shared 99.99% average nucleotide sequence identity  
176 (ANI) to the reference strain J99. By comparison, J99 shares 92% ANI with strain  
177 26695, originating from a distinct individual and geographic region [46]. High ANI among  
178 the isolates in the collection is consistent with a single diversifying strain population  
179 rather than mixed infection with genetically distinct strains. Unique SNPs, and insertion



180 and deletion (indel) events detected in the collection are reported in Table 1. In total,  
181 2,232 SNPs and 573 indels were identified (Table 1, Table S1a-b). This sequence  
182 variation represents changes introduced by both de-novo mutation and recombination.  
183 SNPs were distributed proportionally across coding and intergenic regions. By contrast,  
184 indels were biased towards intergenic regions (chi-squared, p-value<0.0001). Depletion  
185 of indels within coding regions, likely reflects purifying selection due to high potential of  
186 indels to introduce frameshifts, disrupting gene function. Additionally, the ratio of unique  
187 nonsynonymous SNPs (nSNPs) to synonymous SNPs (sSNPs) detected is close to one  
188 (0.98) despite higher number of synonymous sites within the genome. Of the total  
189 unique SNPs and indels detected (n= 2,805), 791 were shared between ancestral and  
190 recent populations, while 263 and 1,751 were exclusively found within the ancestral and  
191 recent populations, respectively. The high number of mutations unique to recent isolates  
192 demonstrates the substantial population divergence that occurred in this patient over  
193 time.

**Table 1. Summary of unique SNPs, Indels detected by WGS among all the isolates (n=39) and in the subset of recent isolates (n=27, yr 2000)**

|                      | <u>Total<sup>a</sup></u> | <u>Coding<sup>a</sup></u> | <u>nS<sup>b</sup></u> | <u>S<sup>b</sup></u> | <u>Intergenic<sup>a</sup></u> |
|----------------------|--------------------------|---------------------------|-----------------------|----------------------|-------------------------------|
| <b>Total SNPs</b>    | 2,232                    | 2,058                     | 1,018                 | 1,040                | 174                           |
| <b>Recent SNPs</b>   | 1,379                    | 1,270                     | 536                   | 734                  | 109                           |
|                      | <u>Total</u>             | <u>Coding<sup>a</sup></u> |                       |                      | <u>Intergenic<sup>a</sup></u> |
| <b>Total Indels</b>  | 573                      | 359                       |                       |                      | 214                           |
| <b>Recent Indels</b> | 372                      | 231                       |                       |                      | 141                           |

194 <sup>a</sup>Unique events are labeled as either coding or intergenic. <sup>b</sup>Events within coding regions  
195 are further subdivided into nonsynonymous (nS) or synonymous (S) categories.

196 To assess extent of genetic diversity within the collection, we calculated the  
197 average pairwise genetic distance ( $\pi$ ) for unique pairwise comparisons of isolates from  
198 the same time point (within time point) to isolates from different time points (between  
199 time point). For between time point comparisons, only antral isolates ( $n=24$ ) were used  
200 to reduce potential confounding effects introduced from comparing isolates from  
201 different anatomical locations. The average genetic distances ( $\pi$ , nucleotide  
202 differences/site) of within time point pairs was  $6.75 \times 10^{-5}$ , while  $\pi$  of between time point  
203 pairs was  $8.23 \times 10^{-4}$ , indicating within host evolution with an average molecular clock  
204 rate of  $1.3 \times 10^{-4}$  substitutions/site/year (Fig. 2a). Overall, recent antral isolates have  
205 increased diversity ( $\pi=9.9 \times 10^{-5}$ ) compared to the ancestral isolates ( $\pi=3.6 \times 10^{-5}$ ),  
206 demonstrating accumulation of genetic diversity during chronic infection (Fig. 2b).

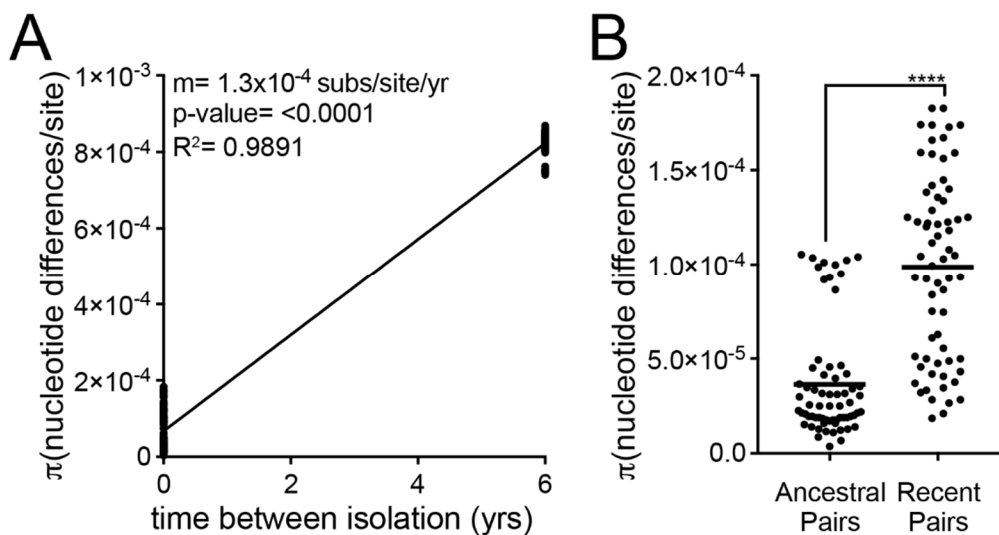

207  
208 **Figure 2. Pairwise comparisons show within host diversification with increasing**  
209 **diversity of infecting populations over time. (A)** Plot shows genetic distance for all  
210 pairwise comparisons of antral samples isolated within the same time point ( $n=132$ , time  
211 between isolation=0 yrs) and samples isolated from different time points ( $n=144$ , time

212 between isolation=6 yrs). Each point is a unique pairwise comparison (n=276). Linear  
213 regression with the slope (m) as the estimation of the molecular clock rate, p-value  
214 derived from F-test, and correlation coefficient ( $R^2$ ) shown. **(B)** Each point represents a  
215 pairwise comparison between antral isolates within the ancestral population (yr 1994,  
216 n=66) or recent population (yr 2000, n=66). The average values between all pairwise  
217 comparisons in the population ( $\pi$  statistic) is shown with a black bar. Significance was  
218 determined using a Student's t-test (\*\*\*\*,  $p < 0.0001$ ).

219

## 220 **Identification of genomic regions enriched for within-host genetic variation**

221 To identify regions of the genome that accumulate within host variation, we  
222 examined enrichment of nonsynonymous SNPs (nSNPs) in specific genes and  
223 functional classes assigned by the microbial genome database (MGDB) add reference.  
224 Out of the 1,495 genes in the reference sequence, 931(62.2%) are annotated with a  
225 functional class (Fig. 3a). Enrichment or depletion was determined by comparing the  
226 distribution of nSNPs among MGDB classes to expected values based on a normal  
227 distribution (Fig. 3, Table S2). We observed cell envelope genes, including OMPs,  
228 accumulated a disproportionate number of nSNPs in both the total dataset of unique  
229 nSNPs and the subset of nSNPs unique to recent group of isolates (Fig. 3b-c, Table  
230 S2). These results are similar to what others studying within-host variation have found.  
231 Accordingly, cell envelope diversification may serve a selective advantage in both the  
232 acute phase of infection as a mechanism of adaptation to a specific host and in the  
233 chronic phase of infection as a mechanism to persist in changing host environments.

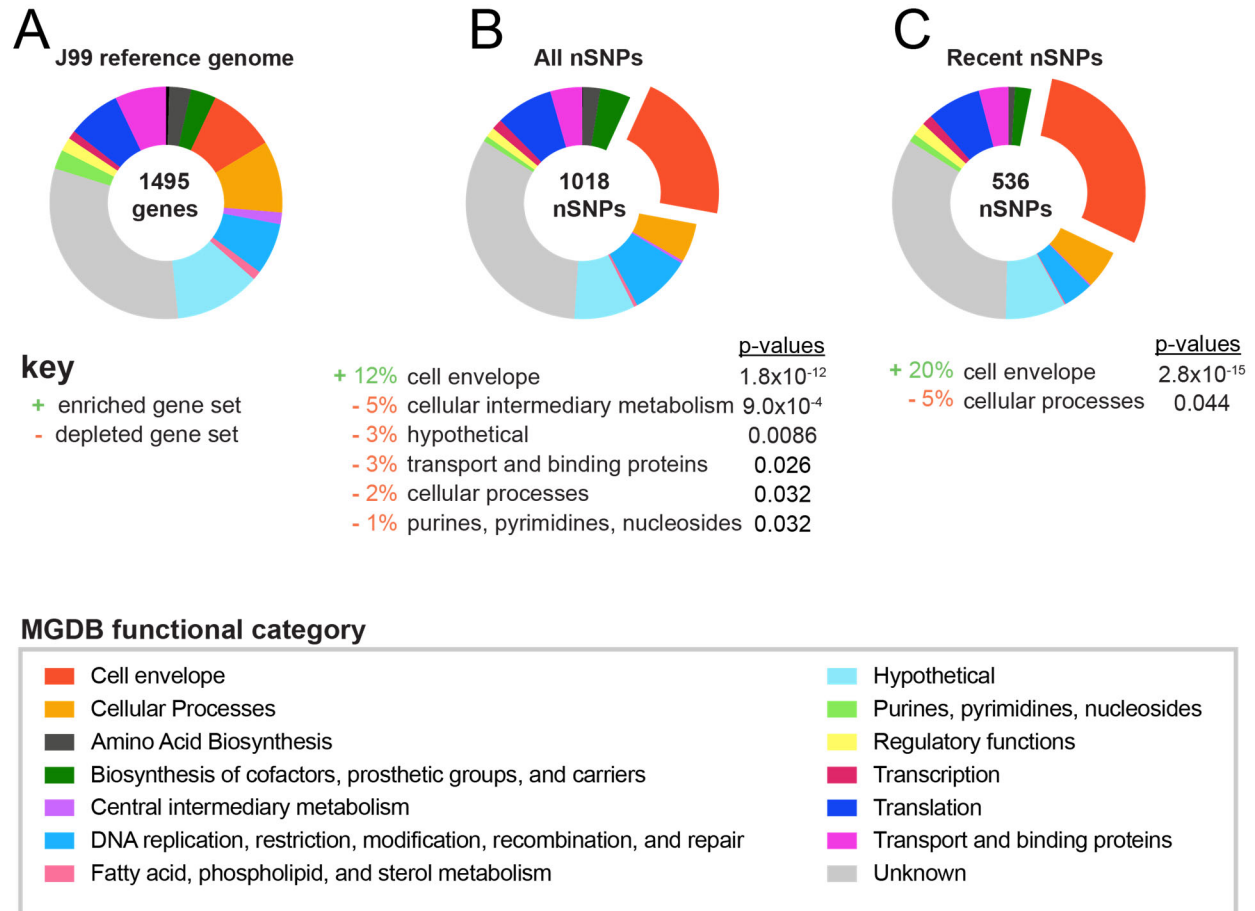

234

235 **Figure 3. Cell envelope genes accumulate genetic variation during chronic**

236 **infection. (A)** Proportion of genes within the reference genome (J99) comprising each

237 of 13 functional classes identified in the Microbial Genome Database and color-coded

238 according to key [48]. Percentage of genes with unknown function are labeled in gray.

239 **(B-C)** Proportion of nSNPs from **(B)** the entire dataset (all nSNPs) and **(C)** from the

240 subset unique to recent isolates (recent nSNPs) that fall within each functional class.

241 Categories with statistically significant enrichment or depletion are listed below each

242 chart with associated percentages and p-values. Fisher's exact tests were used to

243 determine significance and corrected for multiple testing using Benjamini and Hochberg

244 false discovery rate methods.

245 Next, individual genes acquiring the most genetic variation over the six year  
 246 period were identified. The number of nSNPs unique to the recent isolates detected for  
 247 each gene were counted and weighted according to the gene length. The genes most  
 248 highly enriched are listed in Table 2 (Table S3). Many of the genes identified encode  
 249 OMPs (*babA*, *sabA*, *sabB*, and *hopQ*) that play roles in adhesion and exhibit variation  
 250 between and within hosts [49,50].

251 **Table 2. Genes with excess accumulation of nSNPs during chronic infection**

| Gene ID | Annotation    | MGDB function                      | Total nSNPs | Z-scores <sup>a</sup> |
|---------|---------------|------------------------------------|-------------|-----------------------|
| jhp1300 |               | Unknown                            | 18          | 21.52                 |
| jhp1103 | <i>hopQ</i>   | Outer membrane protein             | 45          | 14.89                 |
| jhp1068 | <i>birA</i>   | Biotin protein ligase              | 11          | 10.96                 |
| jhp0659 | <i>sabB</i>   | Outer membrane protein             | 27          | 8.94                  |
| jhp0303 |               | Hypothetical                       | 3           | 7.90                  |
| jhp1096 | <i>glnP_1</i> | Glutamine ABC transporter permease | 8           | 7.73                  |
| jhp1409 |               | Unknown                            | 44          | 7.39                  |
| jhp0302 | <i>argS</i>   | Arginine-tRNA ligase               | 18          | 6.98                  |
| jhp0336 |               | Unknown                            | 19          | 5.07                  |
| jhp1097 | <i>glnP_2</i> | Glutamine ABC transporter permease | 5           | 4.63                  |
| jhp0634 |               | Unknown                            | 7           | 4.29                  |
| jhp1102 |               | Guanine permease                   | 9           | 4.26                  |
| jhp0833 | <i>babA</i>   | Outer membrane protein             | 15          | 4.16                  |
| jhp0662 | <i>sabA</i>   | Outer membrane protein             | 13          | 4.12                  |
| jhp0929 |               | Unknown                            | 3           | 4.10                  |

252 <sup>a</sup>The top 15 annotated genes with Z-scores > 4 for number of nSNPs uniquely acquired  
 253 in the yr 2000 group of isolates within single genes are shown. <sup>b</sup>Z-scores were  
 254 calculated using number of counts per gene normalized according to gene length.

255  
 256 The MGDB does not specifically analyze antibiotic resistance genes. While this  
 257 subject had no known history of antibiotic treatment, the presence of antibiotic  
 258 resistance to metronidazole, ampicillin, clarithromycin, was previously tested. Four  
 259 isolates, three antral and one duodenal, were resistant to clarithromycin due to a

260 mutation in the 23S rRNA gene, but all the other isolates were sensitive to all three [34].

261 To validate, we queried our sequence data for mutations known to confer antibiotic  
262 resistance, but no mutations indicative of additional antibiotic resistance were  
263 discovered.

264

### 265 **Genomic diversity within the recent population is not driven by stomach region** 266 **specific adaptation**

267 To display the genetic relatedness of all the isolates in the collection, a similarity  
268 dendrogram was generated with the SNP data using the Nextstrain platform (Fig. 4a,  
269 [51]). This depiction represents a dendrogram rather than a phylogeny as SNPs  
270 included in these analyses could arise from recombination and therefore are not  
271 necessarily clonally derived [52]. Isolates collected from the two separate time points  
272 (1994 and 2000) cluster into distinct groups on the dendrogram with a long branch  
273 representing an average divergence of  $7.8 \times 10^{-4}$  substitutions/site between the two  
274 populations.

275 In addition to genetic divergence of *H. pylori* populations between time points, we  
276 observed substantial diversity within time points (Fig. 2b). Isolates collected from the  
277 most recent time point originated from biopsy samples from distinct stomach regions,  
278 allowing us to examine if region specific adaptation drives subgroup formation. To  
279 assess this,  $\pi$  for all the pairs isolated from the same source biopsy (within region) was  
280 compared to  $\pi$  from all the pairs from different source biopsies (between region).  
281 Although we hypothesized that isolates from the same source biopsy would be more  
282 similar, we instead found between region pairs have the same level of diversity as within

283 region pairs (Fig. 4b). We also did not find any specific SNPs or indels associated with  
284 isolates from either the antrum or corpus (Table S4a-d). This suggests subgroup  
285 differentiation within time points is not defined by stomach region adaptation in this  
286 patient. Consistent with this finding, nearest neighbors on the dendrogram often come  
287 from different biopsies (Fig. 4a).

288 We defined four distinct subgroups within the collection based on shared genetic  
289 characteristics (Fig. 4c). While the majority of isolates within the ancestral group are  
290 highly related, one isolate, SC4, is more divergent and clusters separately on the  
291 dendrogram. The average pairwise genetic distance between SC4 and each ancestral  
292 isolate is 173 nucleotide differences whereas the average pairwise genetic distance  
293 among all other unique pairs of ancestral isolates is 39 nucleotide differences. Thus, we  
294 named two subgroups of the ancestral isolates according to this divergence (1A and  
295 1B). Within the recent group, there is additional clustering of the isolates into two  
296 subgroups, named 2A and 2B. Group 2A, is comprised of 12 total isolates with 147  
297 unique mutations (SNPs and indels) and group 2B is comprised of 15 total isolates with  
298 216 unique mutations. Both recent subgroups (yr 2000) contain isolates from all three  
299 biopsy locations. The formation of distinct subgroups within a population of isolates  
300 collected from a single time point, suggests the possibility of niche level adaptation, but  
301 these sub-niches must be present in all regions of the stomach sampled.

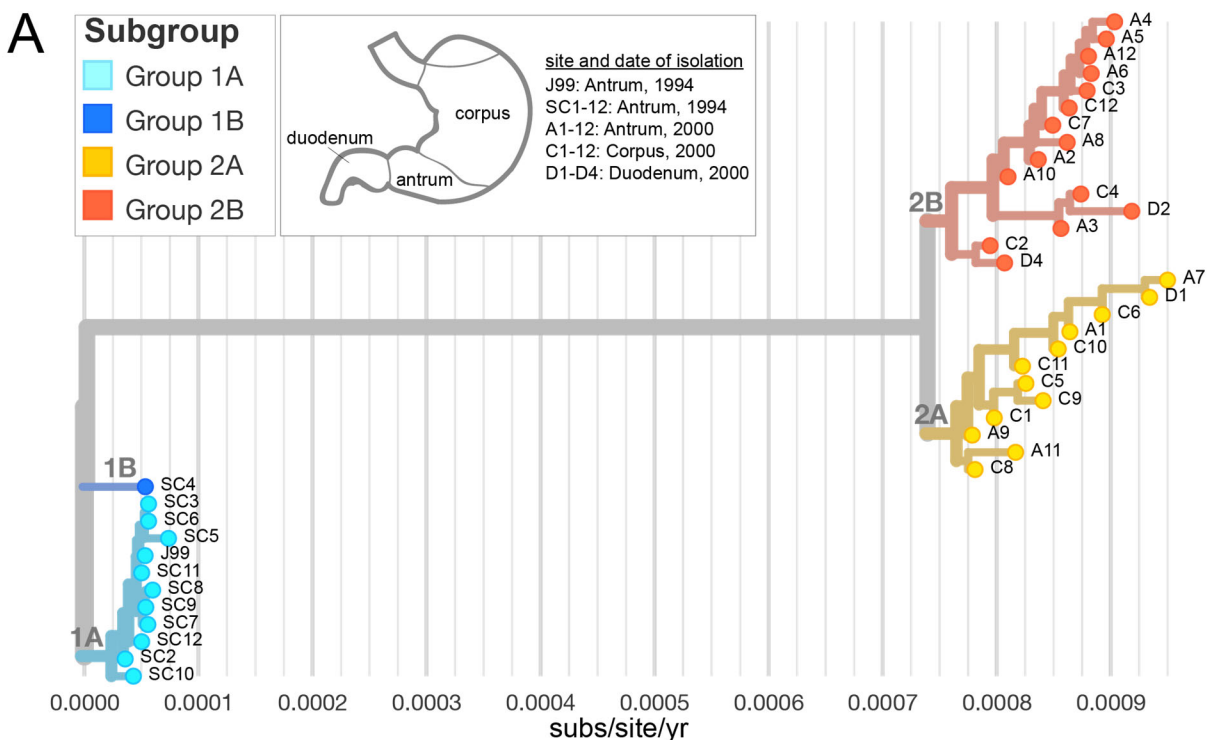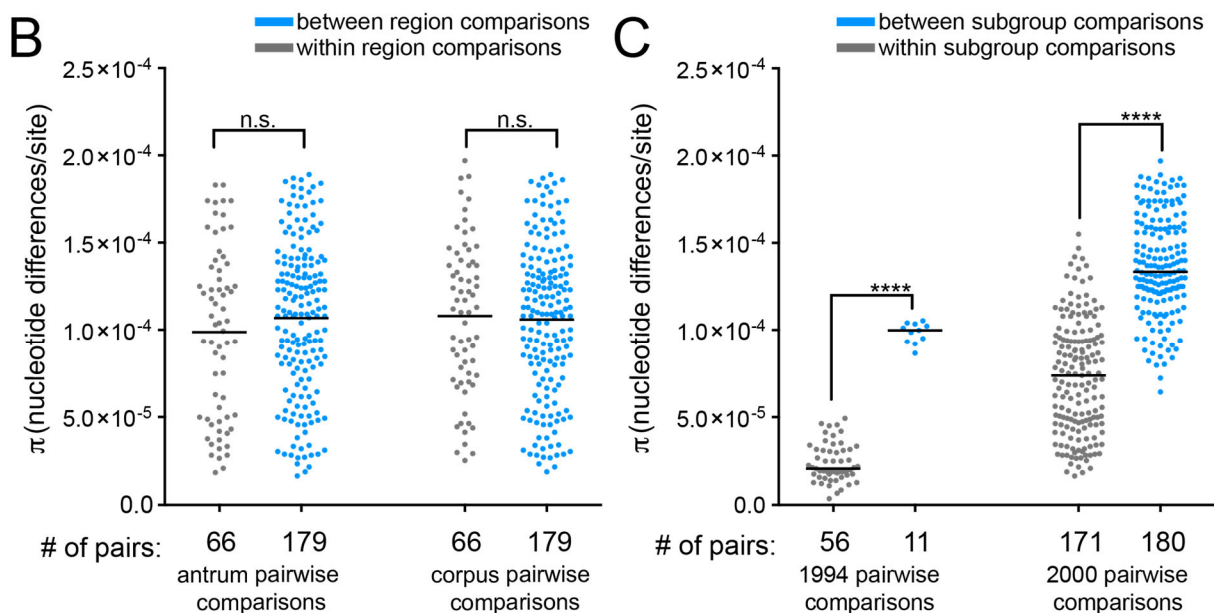

302  
303 **Figure 4. Clustering of strains by genetic similarity suggests distinct subgroups**  
304 **that do not correlate with biopsy site.**  
305 (A) An isolate dendrogram was generated from all SNPs in the collection with Nextstrain  
306 [51]. Isolates were named according to the anatomic region of their source biopsy as



307 annotated in the key and branch coloring was added to distinguish genetically related  
308 subgroups within the collection. Light and dark blue isolates are from 1994 (1A, 1B,  
309 respectively). Orange (2A) and red isolates (2B) are from 2000. The X-axis shows the  
310 number of substitutions (subs)/site/year. **(B-C)** Point on the plot represents the pairwise  
311 genetic distances calculated for groups of isolates described with a black bar  
312 representing the mean ( $\pi$ ). **(B)** Pairwise comparisons of recent isolates within the same  
313 stomach regions (gray) have the same average genetic distance as pairwise  
314 comparisons of isolates from different stomach regions (blue) in both the antrum and  
315 corpus. **(C)** Pairwise comparisons of isolates within subgroups displayed on the isolate  
316 dendrogram (gray) have smaller genetic distances on average than pairwise  
317 comparisons of isolates from different subgroups (blue) from the same time point.  
318 Significance was determined using a Student's t-test (\*\*\*\*,  $p < 0.0001$ ).

319

320 **Recent *H. pylori* isolates have increased proinflammatory activity driven by *cagY***  
321 **genetic variation.**

322 Substantial genetic divergence of *H. pylori* populations over this six year period of  
323 infection, coupled with enrichment of mutations in genes related to virulence, prompted  
324 exploration of pathogenic phenotypes. First, we tested ability of each strain to initiate an  
325 inflammatory response. Each of the 39 isolates was co-cultured with a gastric epithelial  
326 cell line (AGS) for 24hrs (MOI=10) and the release of inflammatory cytokine interleukin-  
327 8 (IL-8) was measured in the supernatants. The J99 ancestral strain and J99  $\Delta cagE$ , a  
328 mutant that blocks assembly of the Cag T4SS, were used as controls in each  
329 independent experiment. All isolates were Cag PAI+ and induced IL-8 at levels above

330 J99  $\Delta$ *cagE*. However, isolates from the most recent time point on average induced more  
331 IL-8 compared to ancestral isolates (Fig. 5a-b). There was some heterogeneity in this  
332 phenotype with the least inflammatory isolates inducing 12% less and the most  
333 inflammatory isolates inducing 56% more IL-8 than J99 (Fig. 5b, Fig. S1). Isolates with  
334 similar IL-8 phenotypes clustered together on the dendrogram; and comparison of the  
335 genetic and phenotypic distances between unique pairs of antral isolates from both time  
336 points (n=276) showed genetic divergence correlates with phenotypic divergence in  
337 induction of IL-8 (Fig. 5c). These data show that isolates able to induce more  
338 inflammation persisted, indicating a possible adaptive advantage of pro-inflammatory  
339 activity during chronic infection in this patient.

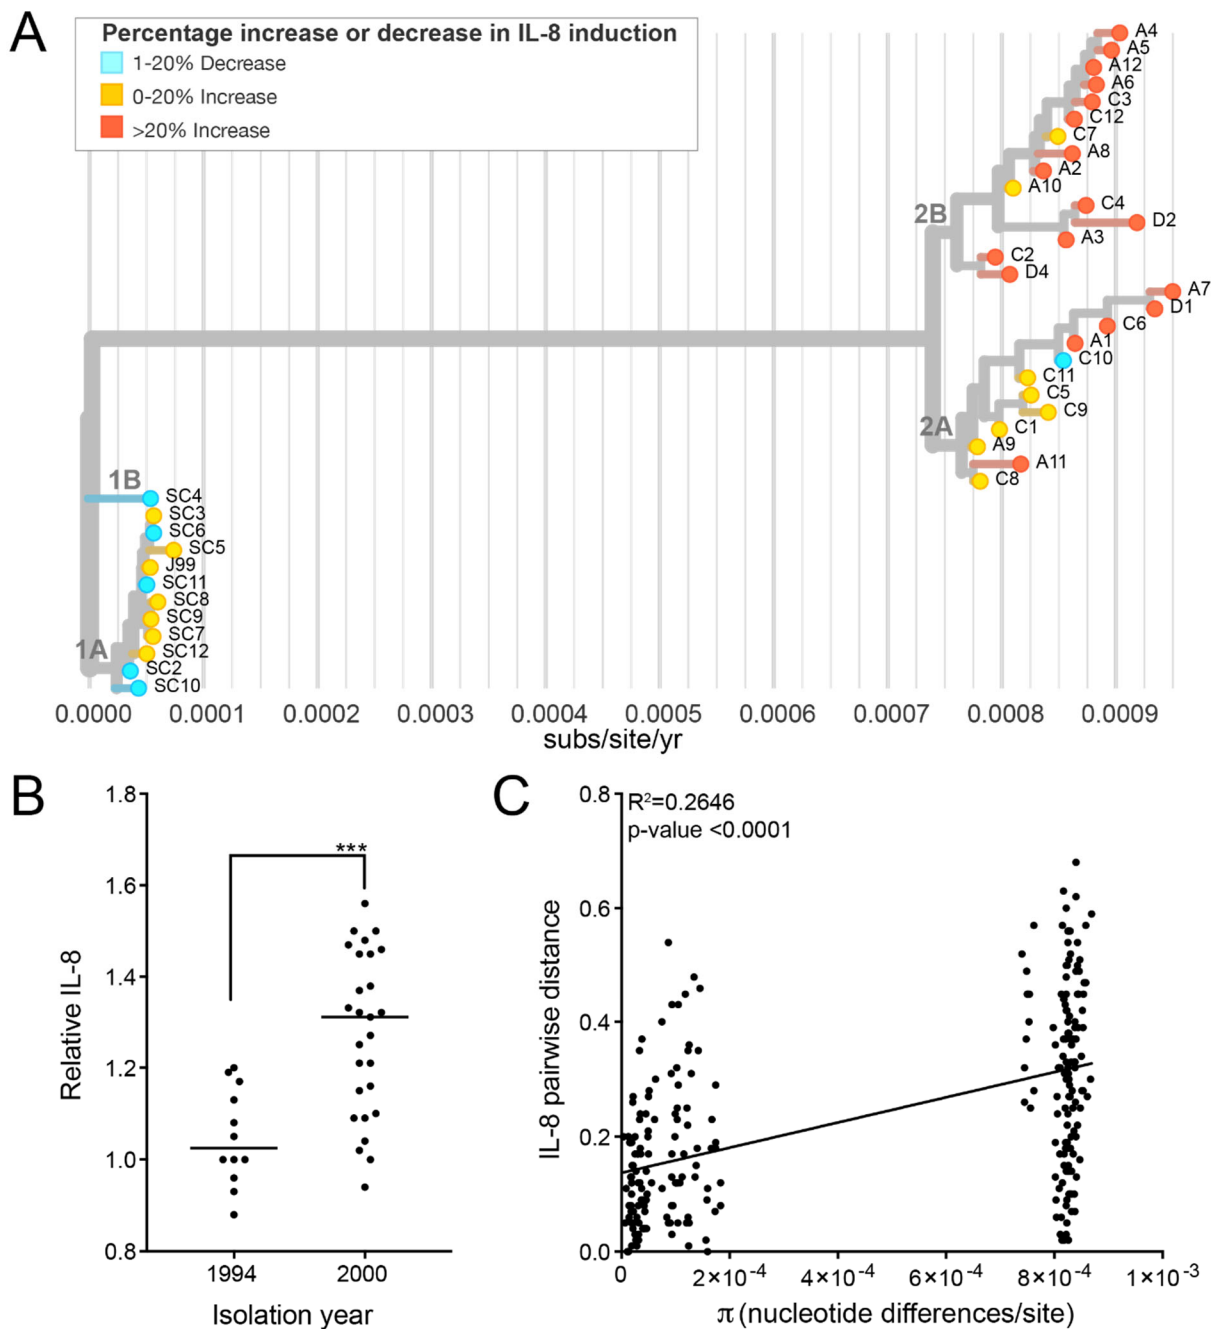

340

341 **Figure 5. Isolates from recent time point have increased induction of IL-8**

342 **secretion during co-culture with gastric epithelial cells. (A)** Isolate dendrogram

343 from Fig. 4a overlaid with IL-8 induction phenotype of each isolate after 24 hours of co-

344 culture (MOI=10) with gastric epithelial cell line (AGS). Leaf colors represent percent

345 increased or decreased IL-8 secretion relative to ancestral isolate J99. **(B)** Each point

346 shows mean value of IL-8 detected in the supernatants of infected AGS cells relative to  
347 J99 for independent isolates. The mean value was calculated from at least two  
348 experiments with triplicate wells. Black line represents the mean values from each  
349 subset of isolates (yr 1994, yr 2000). Significance was determined using a Student's t-  
350 test (\*\*\*\*,  $p < 0.0001$ ). **(C)** Comparison of genetic ( $\pi$ ) and phenotypic (relative IL-8  
351 secreted) distances between unique pairs of antral isolates from both time points  
352 ( $n=276$ ) is shown. Plot shows a linear regression with p-value derived from F-test and  
353 correlation coefficient ( $R^2$ ) reported.

354

355 To investigate the genetic basis of shared IL-8 phenotypes, we focused on  
356 nSNPs that occurred within the Cag PAI. While there was no enrichment of nSNPs  
357 within the Cag PAI as a whole (chi-squared,  $p\text{-value} > 0.999$ ), we did see enrichment in  
358 two Cag PAI genes, *cagY* and *cagA* (Fig. S2a, Table S3). Recent isolates had 7 unique  
359 nSNPs in *cagA*, however none were localized to known functional domains (Fig. S2b)  
360 [53]. Several nSNPs were detected within the middle repeat region of *cagY*. This  
361 domain contains a series of long and short direct repeat sequences that can undergo  
362 recombination resulting in expansion or contraction of repeats. This can attenuate or  
363 enhance Cag T4SS-dependent IL-8 secretion. In animal models of infection,  
364 recombination events that diminish pro-inflammatory activity are dependent on adaptive  
365 immunity [15]. Due to the difficulties in precisely mapping these recombination events  
366 with short-read WGS data, we utilized restriction fragment length polymorphism (RFLP)  
367 together with Sanger sequencing to identify unique alleles of *cagY* within the collection  
368 (Fig. 6a-b, Fig. S2c). All of the recent isolates (Groups 2A and 2B) and ancestral isolate

369 SC4 (Group 1B), share the same RFLP pattern, which is distinct from the RFLP pattern  
370 shared by the other ancestral isolates (Fig. 6a, Fig. S3a). Sanger sequencing revealed  
371 that all the isolates in group 1A, including J99, share the same sequence. However the  
372 allelic variant of *cagY* in SC4 is distinct from that in the recent isolates (Fig. S3b). The  
373 SC4 *cagY* allele carries two mutations shared with recent isolates, including one that  
374 introduced a restriction site seen by RFLP, however it also harbors two unique  
375 mutations not found in any other isolates in the collection. All recent isolates (Group 2A  
376 and 2B) have 9 nSNPs total compared to the J99 *cagY* allele including the two shared  
377 with SC4 (Fig. 6b, Fig. S3c). None of the alleles had expansion or contraction of the  
378 number of repeats, but likely arose from gene conversion from sequences within other  
379 repeats (Fig. S3c). In order to test for a functional link between the variation in *cagY* and  
380 the differences in IL-8 phenotype, we performed an allelic exchange experiment,  
381 replacing the *cagY* allele in J99 ancestral strain with the two other *cagY* allelic variants  
382 (Fig. 6c). Co-culture of these engineered strains with AGS cells showed that the *cagY*  
383 allele shared by the recent isolates, confers the increase in induction of IL-8 at 24hrs.  
384 The SC4 allele in the J99 genomic context induced similar levels of IL-8 secretion as  
385 J99. Therefore, modulation of T4SS function can occur through the introduction of  
386 specific point mutations in the absence of expansion or contraction of the *cagY* repeats.  
387 The same experiment was performed with *cagA* variants, but IL-8 induction was not  
388 significantly different from J99 (Fig. S2c).

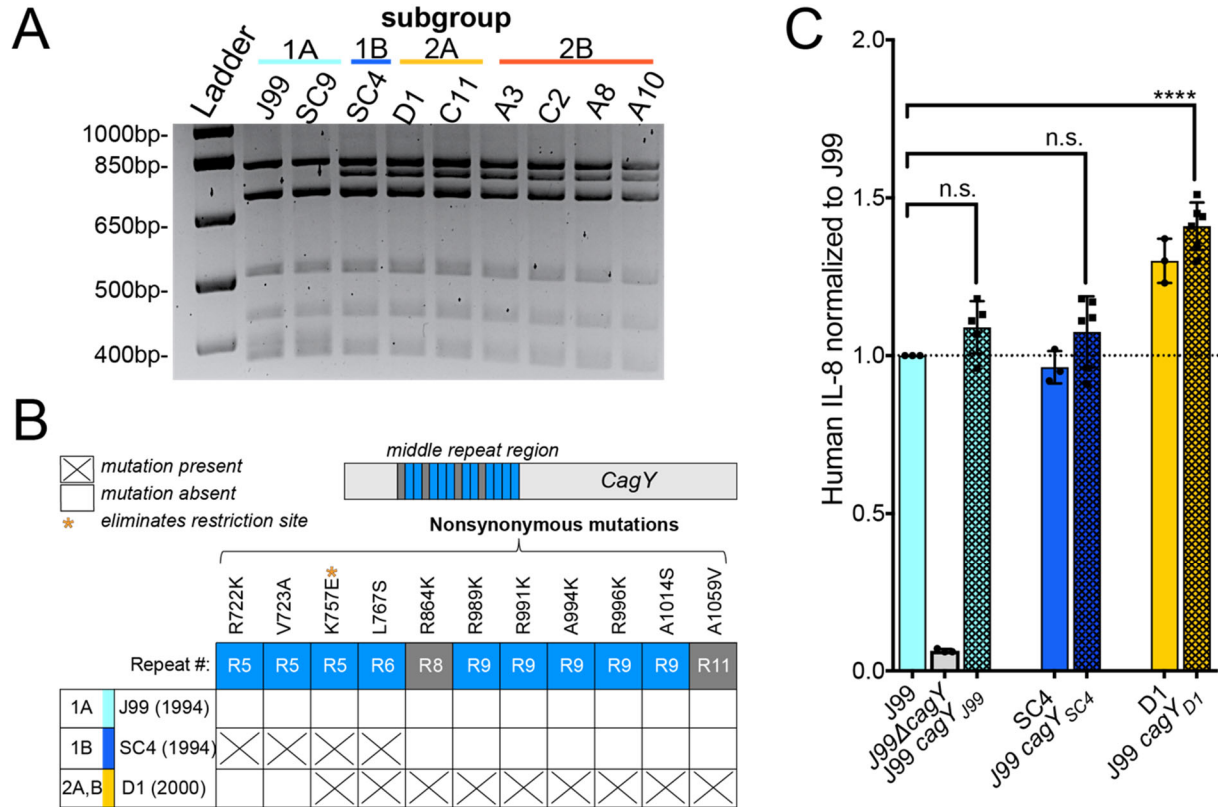

389

390 **Figure 6. *cagY* genetic polymorphisms promote enhanced IL-8 secretion.**

391 **(A)** RFLP analysis of amplified *cagY* repeat region from representative isolates digested

392 with restriction enzyme DdeI reveals two distinct patterns within the populations.

393 Isolates are colored by subgroup as in Fig. 4a. **(B)** Amino acid polymorphisms for the

394 three different allelic variants of *cagY* in our isolate collection detected by Sanger

395 sequencing. Isolates listed represent the three alleles (J99, SC4, D1) with date of

396 isolation and subgroup(s) indicated. All nonsynonymous mutations detected map within

397 the middle repeat region of *cagY* (15 total repeats; short in blue and long in gray). **(C)**

398 Levels of IL-8 produced by *cagY* allelic exchange strains relative to J99 ancestral (y-

399 axis line=1) 24hrs post infection of AGS cells (MOI=10). Data points represent averaged

400 values from triplicate wells from at least 3 independent biological replicates.

401 Significance was determined with a one-way ANOVA with Dunnett's corrections (n.s.  
402 not significant, \*\*\*\*  $p < 0.0001$ ).

403

404 **Sub-populations within the collection have distinct bacterial cell morphologies.**

405 Cell morphology has also been linked to virulence in *H. pylori* [54]. In order to measure  
406 cell morphology we used CellTool, a program which takes 2-D phase contrast images  
407 and measures quantitative cell shape parameters from cell outlines [54]. Based on  
408 these measurements, isolates were divided into three phenotypic shape categories—  
409 short pitch, long pitch, and rod. Short pitch isolates have increased wavenumber per  
410 unit centerline axis length compared to the long pitch and rod isolates. Rod isolates  
411 have decreased side curvature per unit centerline axis length compared to the short and  
412 long pitch isolates (Fig. 7b-c). Isolates with similar shape phenotypes cluster on the  
413 dendrogram (Fig. 7a, Fig. S4a-b). Interestingly, all ten rod-shaped isolates from group  
414 2B had frameshift mutations in *H. pylori* cell shape determining (*csd*) genes known to  
415 cause rod-shape morphology when deleted. We observed four unique mutations in  
416 *csd4*, one unique mutation in *csd5*, and three unique mutations in *csd6*, one of which  
417 was shared by three isolates (Fig. S5). Thus, group 2B appears to have convergent  
418 evolution leading to straight-rod morphology (Fig. 7d).

419         Pairwise comparisons show that recent isolates within the same cell shape  
420 phenotype category are more genetically similar than recent isolates from different cell  
421 shape categories (Fig. 8a). Additionally, plots of the genetic and phenotypic distances  
422 between unique pairs of recent isolates from both time points (n=351) showed that  
423 genetic divergence positively correlates with phenotypic divergence both in

424 wavenumber and size curvature per unit axis length (Fig. 8b-c). This indicates a  
 425 signature of selection for loss in helical shape within this sub-population of recent  
 426 isolates.

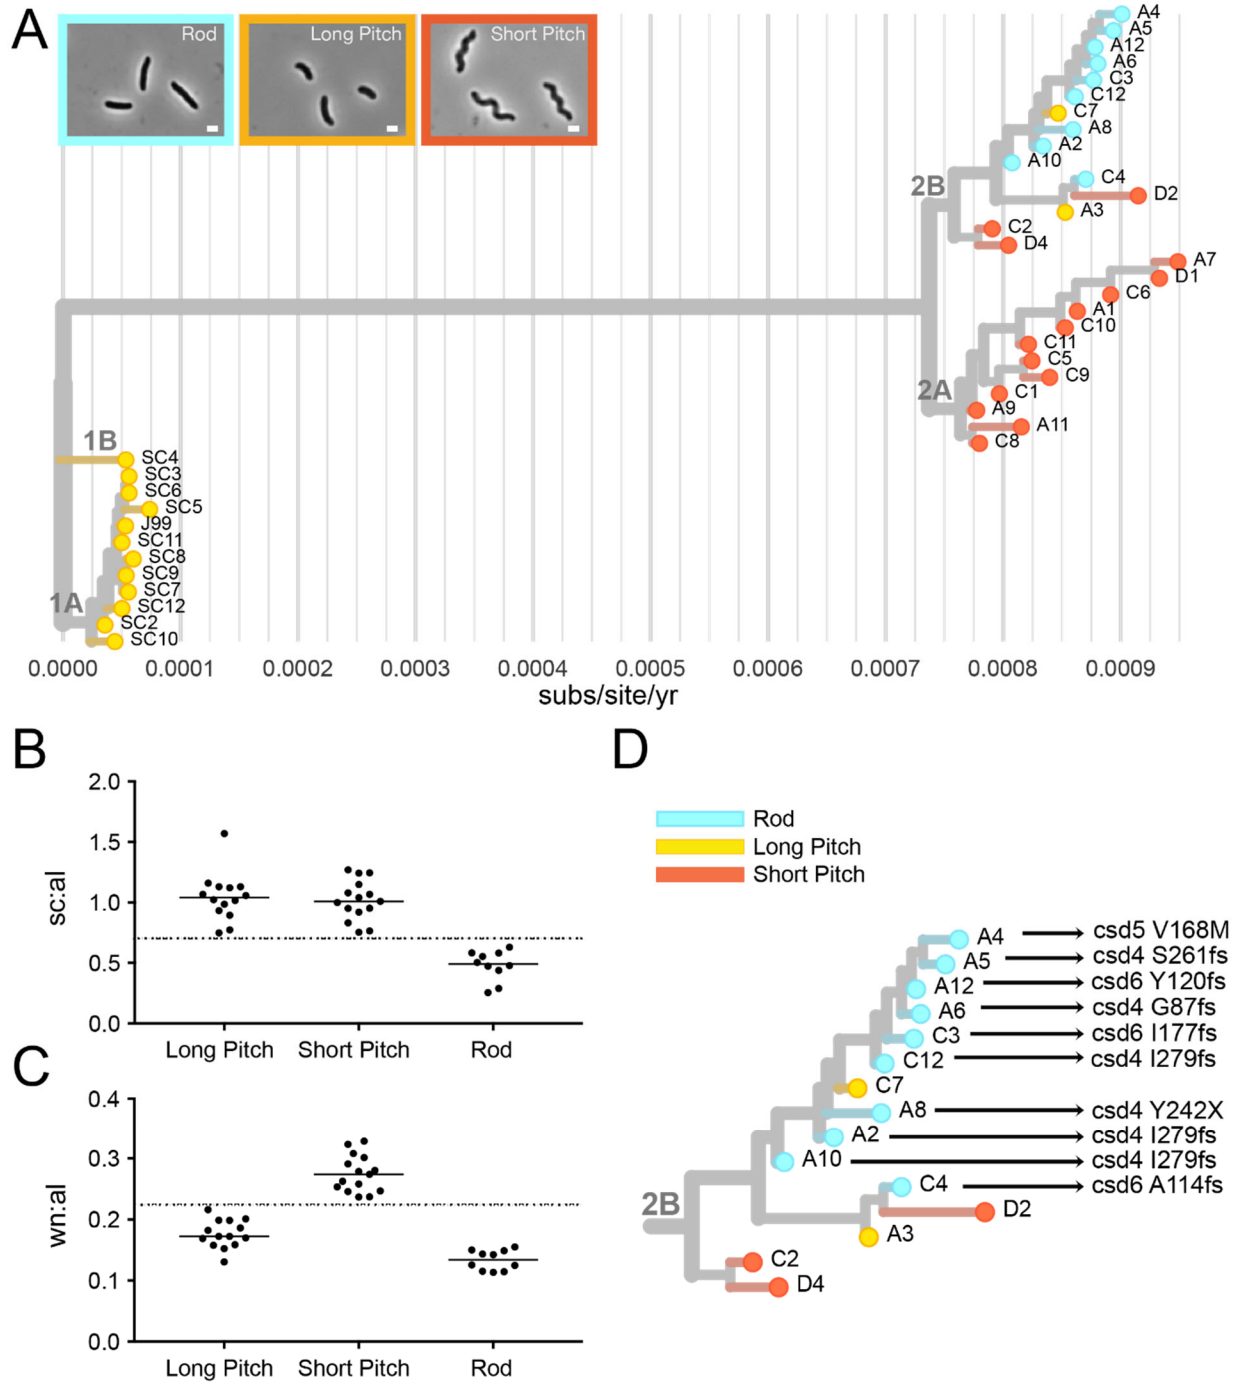



428 **Figure 7. Cell morphology varies among genetically distinct subgroups. (A)** Cell  
429 shape phenotype clustering on isolate dendrogram. Leaves colored to indicate cell  
430 morphology phenotype of each isolate with rods in blue, short pitched in yellow, and  
431 long pitched in orange. Representative phase contrast micrographs of each  
432 morphologic class shown. (magnification=100x, scale bar = 1  $\mu$ m). **(B-C)** Cell shape  
433 parameters calculated from 2-D phase images with CellTool software for isolates with  
434 indicated cell morphologies. Individual points represent mean values for measurements  
435 taken from >100 cells/isolate. Side curvature and wavenumber values were normalized  
436 by cell centerline axis length. **(B)** Mean side curvature values normalized by centerline  
437 axis length ( $sc:al$ ) is decreased in rod shaped cells (<0.7, as indicated by y-axis line)  
438 and **(C)** wavenumber normalized by centerline axis length ( $wn:al$ ) is increased for cells  
439 that have increased wavenumber (>0.225, as indicated by y-axis line). **(D)** Subgroup 2B  
440 labeled with amino acid mutations in cell shape determining genes (*csd4*, *csd5*, *csd6*).  
441

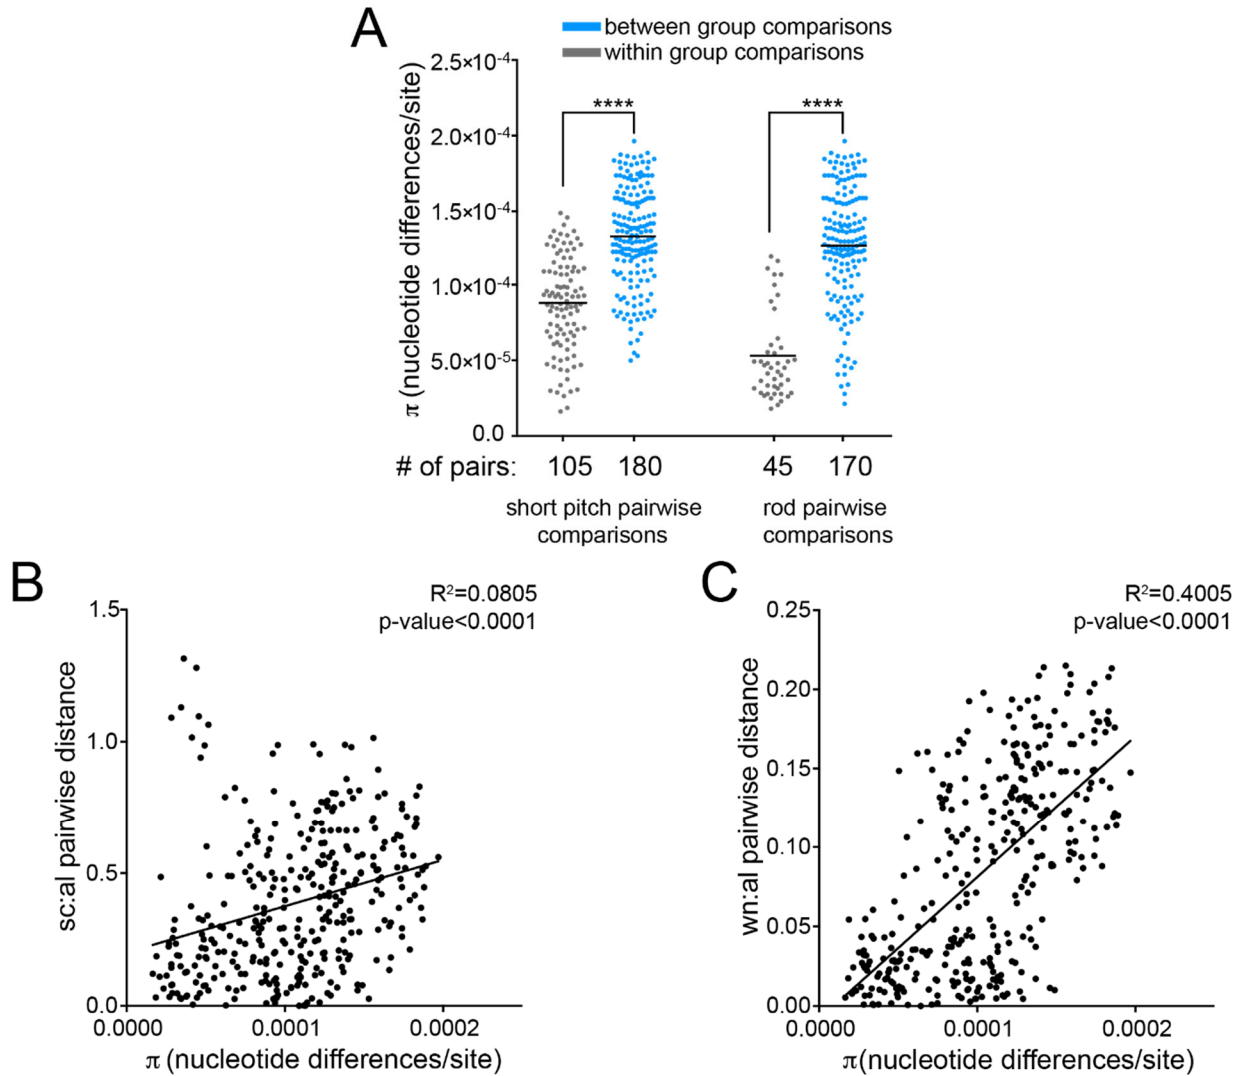

442

443 **Figure 8. Cell morphology parameter divergences correlate with genetic distance**

444 **during chronic infection. (A)** Pairwise comparisons show that recent isolates within

445 the same cell shape phenotype category (gray) are more genetically similar than recent

446 isolates from different cell shape categories (blue). Each point represents a unique

447 pairwise comparison between recent isolates. Midline represents the mean ( $\pi$  statistic).

448 Significance was determined using Student's t-test (\*\*\*\*  $p<0.0001$ ). **(B-C)**. Correlation of

449 genetic and phenotypic distances in **(B)** side curvature (sc) and **(C)** wavenumber (wn)

450 per unit centerline axis length (al) between unique pairs of recent isolates ( $n=351$ ) with

451 each point displaying a unique pairwise comparison. Plot shows a linear regression with  
452 p-value derived from F-test and correlation coefficient ( $R^2$ ) shown.

453

454 **Isolates differ in mouse colonization during acute infection.**

455 Considering the observed phenotypic divergence among isolates between and within  
456 time points, we hypothesized that individual isolates may behave differently in a mouse  
457 stomach colonization model. C57BL/6 mice were infected with representative isolates  
458 from each time point and subgroup for 1 week. All isolates tested successfully colonized  
459 mice. However, the proportion of mice with detectable infection and loads (CFU/gram of  
460 stomach tissue) differed. Almost all the mice infected with the two isolates from group  
461 2A (C11, D1) and the single isolate from the ancestral group 1B (SC4) had higher loads  
462 than representative isolates from the other groups and this increase coincided with a  
463 greater proportion of mice stably infected after one week compared to the others (Fig.  
464 9a). Isolates within different cell shape categories and IL-8 profiles were chosen when  
465 possible. Although loss of helical shape has been shown to decrease colonization, both  
466 helical and rod-shaped isolates from clade 2B infected at lower loads (Fig. 9c). Since  
467 recombination events in *cagY* were detected in all isolates with increased loads, and  
468 these changes impacted the inflammatory response in-vitro, we tested to see if our  
469 ancestral strain (J99) with the recent variant of *cagY* (J99 *cagY*<sub>D1</sub>) would also colonize  
470 at higher loads. However, J99 *cagY*<sub>D1</sub> colonized mice similarly to J99 ancestral (Fig.  
471 9b), indicating the increased mouse colonization phenotype is not conferred by *cagY*  
472 variation. Together these results suggest that there are additional, unknown properties  
473 of these isolates contributing to colonization (Fig. 9c). However, the differences in

474 colonization between groups 2A and 2B and 1A and 1B supports the assertion that  
 475 subgroup differentiation has phenotypic consequences for infection.

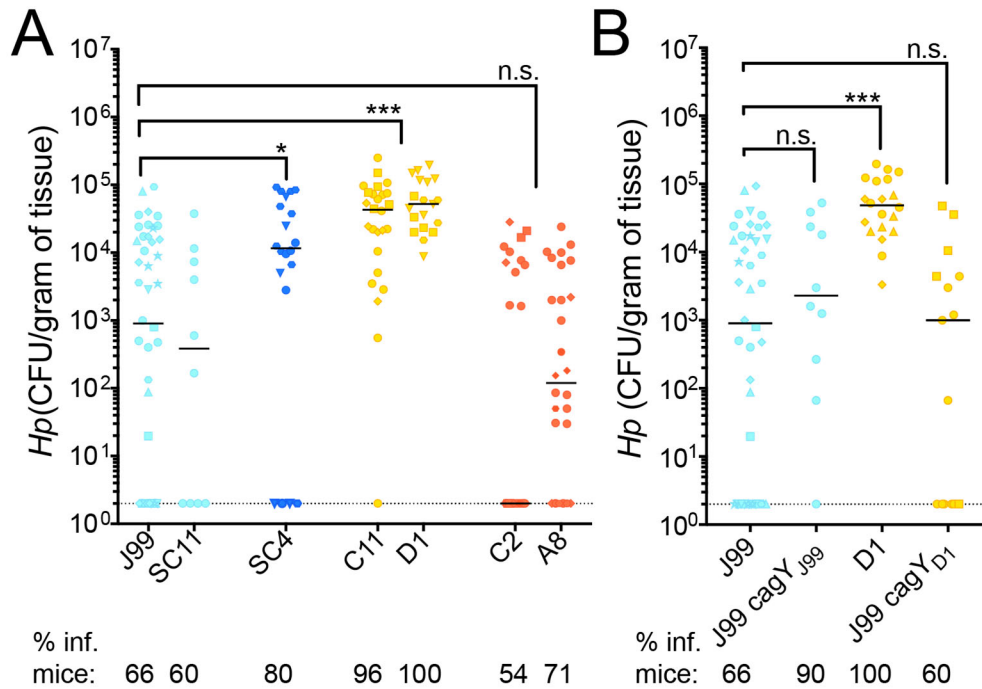

**C**

| Strain | Subgroup | Shape Phenotype | IL-8 Phenotype | Median CFU/gram in Mouse |
|--------|----------|-----------------|----------------|--------------------------|
| J99    | 1A       | Long Pitch      | 0-20% increase | $9.0 \times 10^2$        |
| SC11   | 1A       | Long Pitch      | 1-20% decrease | $3.8 \times 10^2$        |
| SC4    | 1B       | Long Pitch      | 1-20% decrease | $1.2 \times 10^4$        |
| C11    | 2A       | Short Pitch     | 0-20% increase | $4.3 \times 10^4$        |
| D1     | 2A       | Short Pitch     | >20% decrease  | $5.2 \times 10^4$        |
| C2     | 2B       | Short Pitch     | >20% decrease  | $2.0 \times 10^0$        |
| A8     | 2B       | Rod             | >20% decrease  | $1.2 \times 10^2$        |

476  
 477 **Figure 9. Mouse colonization among isolates from distinct subgroups differs and**  
 478 **is not explained by *cagY* variation. (A-B)** Each point represents the colony forming  
 479 units per gram of mouse tissue homogenate from a single mouse. Two CFU/gram is the  
 480 limit of detection (dotted line). Biological replicates indicated by different symbol shapes  
 481 with the median shown. P-values were calculated from pooled experimental replicates  
 482 using a Mann-Whitney non-parametric test (n.s. not significant, \*  $p < 0.05$ , \*\*\*  $p < 0.001$ ).

483 Percentage of mice with bacterial colonization above the limit of detection (% inf. mice)  
484 is indicated below the isolate names. **(A)** Colonization in WT B6 mice 1 week post  
485 infection with representative isolates from each subgroup. Color indicates isolate  
486 dendrogram subgroup 1A (light blue), 1B (dark blue), 2A (yellow), and 2B (red). **(B)**  
487 Alleles of *cagY* from indicated strains were engineered into strain J99 at the native locus  
488 and resultant isolates used for infection experiments. Data points in blue are mice  
489 infected with J99 variant of *cagY* and points colored in yellow were infected with D1  
490 variant of *cagY*. **(C)** Summary of representative isolate phenotypic characteristics  
491 including the subgroup, bacterial shape, IL-8 phenotype (relative IL-8), and median  
492 mouse colonization (CFU/gram).

493

## 494 **Discussion**

495 Within-host *H. pylori* isolates from a single individual, once thought to be  
496 homogenous, have since been shown to be genetically distinct. Next-generation  
497 sequencing provides tools to examine the breadth of diversity present, however little is  
498 known about how this diversity contributes to pathogenesis and disease progression.  
499 Our study characterized both genetic and phenotypic diversity of infecting populations  
500 from a single, chronically infected individual at two time points over a six-year period.  
501 Within host evolution of *H. pylori* is shaped both by de-novo mutation and homologous  
502 recombination events, with recombination events generating the majority of the overall  
503 diversity. Previous studies have estimated the within-host mutation rate by excluding  
504 predicted recombination sites in order to make evolutionary inferences [35,55,56].  
505 Estimated mutation rates of serial isolates range between  $6.5-0.5 \times 10^{-5}$

506 substitutions/site/year. [57] However, it remains debated whether diversity generated via  
507 recombination versus mutation can be accurately identified and filtered to reconstruct  
508 evolutionary relationships [56,57,58]. With our analysis, we took an agnostic approach,  
509 exploring sequence level diversity acquired by both mechanisms. Our overall within-  
510 host molecular clock rate ( $1.3 \times 10^{-4}$  subs/site/yr) is slightly elevated compared with other  
511 published estimates, since clustered nucleotide polymorphisms (CNPs), which are  
512 typically excluded from molecular clock rate calculations, were included in this analysis  
513 [57]. However, the nucleotide identity of strains, falls within what has been previously  
514 documented for isolates from a single individual [37].

515         We found that in this individual, with no known exposure to antibiotics, infecting  
516 populations increased diversity over time and clustered into genetically distinct  
517 subgroups, suggesting adaptation to specific host niches [34]. Accumulation of nSNPs  
518 in OMPs supports a model of adaptation driven by interactions with the host  
519 environment. In other chronic infections, such as *Pseudomonas aeruginosa* infection in  
520 cystic fibrosis patients, the emergence of sub-populations is driven by region specific  
521 adaptation within distinct anatomical regions of the lung [59]. Evidence of anatomical  
522 stomach region specific adaptation in *H. pylori* infections is limited, but it appears to  
523 occur in only a small subset of patients [37]. These signatures may be obfuscated by  
524 frequent population mixing and migration or deterioration of structured niches due to  
525 loss of acid production and other tissue changes [42].

526         While our data do not support subgroup divergence by anatomic region in this  
527 individual, the selective pressures at play appear to correspond to known pathogenicity  
528 phenotypes. Nonsynonymous mutations detected within the recent population (yr 2000),

529 fell within known virulence genes, including OMPs involved in host adhesion and Cag  
530 PAI-associated genes. Distinct alleles within the population were confirmed by Sanger  
531 sequencing. Differences in IL-8 secretion, bacterial cell morphology, and ability to  
532 colonize a mouse in an acute infection model were discovered among isolates,  
533 suggesting subgroup divergence driven by tissue features that vary in the stomach  
534 across multiple anatomic locations.

535         Recombination within the middle repeat region of *cagY*, resulting in expansion or  
536 contraction of repeats, occurs frequently in short-term animal infections and in humans  
537 [15]. We observed modulation of IL-8 induction mediated by T4SS function through  
538 mutation and/or recombination without expansion or contraction of *cagY* repeats. The  
539 finding that isolates at later time points were more pro-inflammatory was surprising  
540 considering, inflammation is thought to limit bacterial burden. However, *H. pylori*  
541 persists despite relatively high levels of inflammation, so it is possible this feature may  
542 be exploited during chronic infection in order to reduce competition for host resources  
543 by members of the microbiota [60].

544         Isolates within this collection also had differences in cell morphology. Morphology  
545 differences have been observed among strains from different individuals [61]; here we  
546 find that *H. pylori* morphologies differ among isolates from a single patient. In subgroup  
547 2B, we discovered convergent loss of helical cell shape through multiple unique  
548 frameshift mutations in cell shape determining (*csd*) genes. Rod-shape isolates have  
549 previously been shown to have a colonization deficit manifest at early time points, but to  
550 recover during 1-3 months of chronic infection in mice [62]. Due to clustering of rod  
551 shapes in subgroup 2B, we suspect that helical shape, while important for early

552 infection and transmission, may be detrimental at later stages of human infection or in  
553 particular stomach niches. Among isolates that retained helical shape, we detected  
554 more subtle differences in helical pitch, but it is unknown what genetic determinants are  
555 responsible or if these differences have direct impacts on colonization.

556         The observed differences in mouse colonization between isolates from each sub-  
557 population supports our initial hypothesis that there are functional consequences of sub-  
558 population divergence. Typically, clinical isolates infect mice poorly as mice are not  
559 natural hosts for *H. pylori*. However, a few clinical isolates have the intrinsic ability to  
560 colonize and can become more robust via serial passage in the mouse stomach [63].  
561 Bacterial properties, including chemotaxis, cell shape, and activity of the Cag PAI,  
562 impact mouse colonization and are likely important in establishing human infections  
563 [64]. In our collection, there was heterogeneity in mouse colonization among isolates  
564 that corresponded to sub-group defined by the isolate dendrogram. Robust colonizers  
565 may be more likely to be involved in person-to-person transmission in humans, but it is  
566 also possible that these strains may behave differently in other animal models or human  
567 hosts. Increases in colonization potential of representative isolates within 1B and 2B  
568 sub-populations does not correlate with differences in morphology or IL-8 phenotypes,  
569 indicating an additional unknown factor or combination of factors is responsible for  
570 conferring a colonization advantage. Further exploration of the genetic basis for mouse  
571 colonization advantage using the subgroup specific variants defined in this study may  
572 give new clues to the complex selective forces operant during chronic stomach  
573 colonization by *H. pylori*.

574



575

## 576 **Materials and Methods**

### 577 **Growth and isolation of *H. pylori***

578 In the initial sampling, a total of 43 *H. pylori* isolates (13 (antral, 1994), 5 (duodenum,  
579 2000), 12 (corpus, 2000), 1 (cardia), and 12 (antral, 2000)) were collected from biopsy  
580 samples from two separate upper gastrointestinal endoscopies performed in a single  
581 48-yr old Caucasian male (1994) residing in Tennessee and treated at the Nashville VA  
582 Medical Center. Only 39 isolates with sufficient sequence coverage (30x) were analyzed  
583 in this study (Fig. 1). *H. pylori* isolates were grown on solid media, horse blood agar (HB  
584 agar) or shaking liquid cultures. HB agar plates contain 4% Columbia agar base (Oxoid,  
585 Hampshire, UK), 5% defibrinated horse blood (Hemostat Labs, Dixon, CA), 10 mg/ml  
586 vancomycin (Thermo Fisher Scientific, Waltham, MA), 2.5 U/ml polymyxin B (Sigma-  
587 Aldrich, St.Louis, MO), 8 mg/ml amphotericin B (Sigma-Aldrich), and 0.2%  $\beta$ -cyclodextrin  
588 (Thermo Fisher). For HB agar plates used to grow *H. pylori* from homogenized mouse  
589 stomach, 5 mg/ml cefsulodin (Thermo Fisher), 5 mg/ml trimethoprim (Sigma) and  
590 0.2mg/uL of Bacitracin (Acros Organics, Fisher) are added to prevent outgrowth of  
591 mouse microflora. Shaking liquid cultures were grown in brucella broth (Thermo Fisher  
592 Scientific, Waltham, MA) supplemented with 10% heat inactivated FBS (Gemini  
593 BioProducts, West Sacramento, CA). Plate and flasks were grown at 37°C under micro-  
594 aerobic conditions in 10% CO<sub>2</sub>, 10% O<sub>2</sub>, 80% N<sub>2</sub>, as previously described [65]. For  
595 resistance marker selection, HB agar plates were supplemented with 15  $\mu$ g/ml  
596 chloramphenicol, or 30 mg/ml sucrose, as appropriate.

597

### 598 **DNA extraction, genome sequencing**

599 Genomic DNA from each isolate to be sequenced was purified using the Wizard  
600 Genomic DNA Purification Kit (Promega, Fitchburg, WI) and libraries were constructed  
601 and indexed using Nextera<sup>RTM</sup> DNA Library Prep Kit (Illumina, San Diego, CA) and  
602 Nexterna<sup>RTM</sup> Index Kit (Illumina). All cultured isolates (n=43) were sequenced on an  
603 Illumina MiSeq instrument in the Fred Hutchinson Genomics Shared Resource. Four  
604 isolates with average coverage below 30x were dropped from the analysis. Short read  
605 fastq sequence files from the remaining 39 isolates in this study are publicly available  
606 on NCBI SRA database (BioProject accession: PRJNA633860,  
607 <<https://www.ncbi.nlm.nih.gov/sra/PRJNA622860>>).

#### 608 **Enrichment of nonsynonymous mutations in genes and functional gene classes**

609 Gene annotations were made using the available Genbank file available for J99  
610 (AE001439) with some manually added annotations of OMPs. All annotation files are  
611 available at <[https://github.com/salama-lab/Hp\\_J99](https://github.com/salama-lab/Hp_J99)>. For identification of genes with  
612 excess accumulation of nSNPS, Z-scores were calculated using number of counts per  
613 gene normalized according to gene length. Genes with nSNP accumulation greater or  
614 equal to four standard deviations from the mean are listed in Table 2. Z-scores for all  
615 genes are listed in Table S3. To identify enrichment of nSNPs within functional gene-  
616 sets, each of the 1495 genes were annotated with designations in the Microbial  
617 Genome Database (MGDB, <http://mbgd.genome.ad.jp/>). A Fisher's exact test was used  
618 to identify MGDB gene class categories with enrichment or depletion of nSNPs. The  
619 number of nSNPs falling within certain MGDB categories were compared to expected  
620 values based on a normal distribution and p-values were corrected for multiple testing

621 using Benjamini and Hochberg false discovery rate methods [66]. Adjusted p-values  
622 <0.05 were considered statistically significant.

623

## 624 **Bioinformatic analysis**

625 Using J99 ancestral as the reference strain, variants were called from raw paired end  
626 reads using the Breseq v0.35.0 software with default parameters and SNPs were further  
627 validated using default Samtools software suite [67]. The number of nucleotide  
628 differences per site (genetic distance) between pairs of isolates was calculated using  
629 PopGenome (R) (nucleotide diversity,  $\pi$ , [68], PopGenome, [69]). All sites that did not  
630 align to the reference genome, J99, or had read depth <5 were excluded from the  
631 analysis. The unique number of shared sites for each pair was calculated using the  
632 BEDtools intersect function [70], reported in Table S5 and the total number of nucleotide  
633 differences were derived from the list of SNPs detected (Table 1a) with low quality sites  
634 filtered according to the read depth parameters above. All detected indels also were  
635 excluded from this analysis to avoid inflation of genetic distance due to alignment errors  
636 within highly repetitive regions [71]. The statistical significance of differences between  
637 groups was assessed using Student's t-test as indicated in figure legends. Isolate  
638 dendrogram was created using Nextstrain v 1.8.1. All datasets, config files,  
639 documentation, and scripts used in this analysis or to generate figures are available  
640 publicly at <<https://nextstrain.org/community/salama-lab/Hp-J99>>.

641

## 642 **Sequencing and PCR-RFLP of cagY middle repeat region**

643 The *cagY* sequences were determined using Sanger sequencing using primers listed in  
644 Table S6 and PCR-RFLP as previously described [15]. Flanking primers were used to  
645 amplify the *cagY* repeat region from every isolate. Amplicons were purified with  
646 QIAquick PCR purification kit according to the instructions from the manufacturer  
647 (Qiagen, MD) and digested with restriction enzyme DdeI (New England Biolabs,  
648 Ipswich, MA). Digested amplicons were run on a 3% agarose for visualization after  
649 ethidium bromide staining.

### 650 651 **Construction of *H. pylori* mutants**

652  
653 Six J99 mutants were constructed (J99 $\Delta$ *cagY*, J99 *cagY*<sub>D1</sub>, J99 *cagY*<sub>SC4</sub>, J99  $\Delta$ *cagA*,  
654 J99 *cagA*<sub>D1</sub>, J99  $\Delta$ *cagE*) and are listed in Table S7. Isogenic knockout mutants, J99  
655  $\Delta$ *cagY* and J99  $\Delta$ *cagA*, were constructed using a vector-free allelic replacement  
656 strategy. Upstream and downstream genomic regions flanking the gene were amplified  
657 and ligated to a *catsacB* cassette, which confers mutants both chloramphenicol  
658 resistant (*cat*) and sucrose sensitivity (*sacB*). Positive clones were selected with 15  
659  $\mu$ g/ml chloramphenicol, as previously described [72,73]. We integrated variant alleles of  
660 the deleted gene at the native locus using sucrose counter selection. All mutants were  
661 validated via diagnostic PCR and Sanger sequence. Primers used for generating *H.*  
662 *pylori* mutants are listed in Table S6 in the supplemental material.

### 663 664 ***H. pylori* co-culture experiments and IL-8 Detection**

665 AGS cells, from a human gastric adenocarcinoma cell line (ATCC CRL-1739), were  
666 grown in Dulbecco's modified Eagle's medium (DMEM) (Thermo-Fisher) supplemented  
667 with 10% heat-inactivated FBS (Gemini-Benchmark). For co-culture with *H. pylori*, AGS

668 cells were seeded at  $1 \times 10^5$  cells/well in 24-well plates 16h prior to infection. The day of  
669 infection, medium was removed from AGS cells and mid-log-phase (optical density at  
670 600 nm (OD) 0.3-0.6) *H. pylori* resuspended in DMEM–10% FBS–20% Brucella broth  
671 was added at multiplicity of infection of 10:1. Supernatants from triplicate wells of each  
672 condition were collected at 24 hrs and assayed for the IL-8 concentration using a  
673 human IL-8 enzyme-linked immunosorbent assay (ELISA) kit according to the  
674 instructions of the manufacturer (BioLegend, San Diego, CA). IL-8 values were reported  
675 as normalized values defined as a proportion increased or decreased compared to  
676 values obtained for J99, which was included in each experimental replicate. P-values  
677 were calculated from pooled replicates from at least two independent experiments using  
678 a one-way ANOVA with Dunnett's corrections.

679

### 680 **Analysis of Cell Morphology**

681 Phase contrast microscopy and quantitative analysis using CellTool software package  
682 was performed as previously described [54]. Bacterial cell masks were generated  
683 through thresholding function in ImageJ. Average side curvature, wavenumber, and  
684 centerline axis length were derived from thresholded images of bacteria (>100  
685 cells/strain) using the CellTool software package. Average parameters were then used  
686 to calculate side curvature or wavenumber to centerline axis length ratios for each  
687 isolate.

688

### 689 **Mouse colonization**

690 Female C57BL/6 mice 24–28 days old were obtained from Jackson Laboratories and  
691 certified free of endogenous *Helicobacter* by the vendor. The mice were housed in

692 sterilized microisolator cages with irradiated rodent chow, autoclaved corn cob bedding,  
693 and acidified, reverse-osmosis purified water. All mouse colonization experiments were  
694 performed exactly as described [74]. The inoculum for each infection was  $5 \times 10^7$  cells.  
695 After excision, the forestomach was removed and opened along the lesser curvature.  
696 Stomachs were divided in equal halves containing both antral and corpus regions and  
697 half stomachs were placed in 0.5 mL of sterile BB10 media, weighed, and homogenized.  
698 Serial homogenate dilutions were plated on nonselective HB plates. After 5-9 days in tri-  
699 gas incubator, colony forming units (CFU) were enumerated and reported as CFU per  
700 gram of stomach tissue. P-values were calculated from pooled experimental replicates  
701 using a Mann-Whitney non-parametric test.

## 702 **Statistical analysis**

703 Statistical analyses were performed according to test specified above and in each figure  
704 legend using Prism v7 software (GraphPad) or R v3.2.1. P-values greater than or equal  
705 to 0.05 were considered statistically significant and are marked with asterisks ( \*,  
706  $p < 0.05$ , \*\*,  $p < 0.01$ ; \*\*\*,  $p < 0.001$ ; \*\*\*\*,  $p < 0.0001$ ; n.s., not significant).

707

## 708 **Ethics Statement**

709 All procedures were approved by Vanderbilt University and Nashville Department of  
710 Veterans Affairs institutional review boards. All mouse experiments were performed in  
711 accordance with the recommendations in the National Institutes of Health Guide for the  
712 Care and Use of Laboratory Animals. The Fred Hutchinson Cancer Research Center is  
713 fully accredited by the Association for Assessment and Accreditation of Laboratory  
714 Animal Care and complies with the United States Department of Agriculture, Public

715 Health Service, Washington State, and local area animal welfare regulations.  
716 Experiments were approved by the Fred Hutch Institutional Animal Care and Use  
717 Committee, protocol number 1531.

718

## 719 **Acknowledgements**

720 The authors would like to acknowledge Rick Peek Jr lab members for collecting,  
721 processing, and sharing the samples and isolates used in this study, Katherine Xue for  
722 assistance with Breseq and Samtools variant calling, Jesse Domingo and Sherwin  
723 Shabdar for their contributions to the CellTool collection of 2D images. This research  
724 was supported by R01 AI054423 (NRS), T32 CA009657(LKJ), P30 DK056465-16S1,  
725 R35 GM119774 (TB), and the Genomic & Bioinformatics and Comparative Medicine  
726 Shared Resources of the Fred Hutch/University of Washington Cancer Consortium (P30  
727 CA015704). TB is a Pew Biomedical Scholar.

728

## 729 **References**

- 730 1. Parsonnet J, Friedman G, Vandersteen D. Helicobacter pylori infection and the  
731 risk of gastric carcinoma. N Engl J Med. 1991;325(16):1127–31.
- 732 2. Ohata H, Kitauchi S, Yoshimura N, Mugitani K. Progression of chronic atrophic  
733 gastritis associated with Helicobacter pylori infection increases risk of gastric  
734 cancer. Int J Cancer. 2004;109:138–43.
- 735 3. Blaser MJ, Atherton JC. Helicobacter pylori persistence : biology and disease. Sci  
736 Med. 2004;113(3):321–33.
- 737 4. Blaser MJ, Berg DE. Helicobacter pylori genetic diversity and risk of human

- 738 disease. *J Clin Invest*. 2001;107(7):767–73.
- 739 5. Salama NR, Gonzalez-Valencia G, Deatherage B, Aviles-Jimenez F, Atherton JC,  
740 Graham DY, et al. Genetic Analysis of *Helicobacter pylori* Strain Populations  
741 Colonizing the Stomach at Different Times Postinfection †. *J Bacteriol*.  
742 2007;189(10):3834–45.
- 743 6. Suerbaum S, Josenhans C. *Helicobacter pylori* evolution and phenotypic  
744 diversification in a changing host. *Nat Rev Microbiol*. 2007;5(6):441–52.
- 745 7. Linz B, Windsor HM, McGraw JJ, Hansen LM, Gajewski JP, Tomsho LP, et al. A  
746 mutation burst during the acute phase of *Helicobacter pylori* infection in humans  
747 and rhesus macaques. *Nat Commun* [Internet]. 2014;5(May):1–8. Available from:  
748 <http://www.nature.com/doi/10.1038/ncomms5165>
- 749 8. Dang BN, Graham DY. *Helicobacter pylori* infection and antibiotic resistance: a  
750 WHO high priority? *Nat Publ Gr* [Internet]. 2017;14(7):383–4. Available from:  
751 <http://dx.doi.org/10.1038/nrgastro.2017.57>
- 752 9. Sun L, Talarico S, Yao L, He L, Self S, You Y, et al. Droplet digital PCR-based  
753 detection of clarithromycin resistance in *Helicobacter pylori* isolates reveals  
754 frequent heteroresistance. *J Clin Microbiol*. 2018;56(9):1–11.
- 755 10. Blaser MJ, Perez-perez GI, Kleanthous H, Cover TL, Peek RM, Chyou PH, et al.  
756 Infection with *Helicobacter pylori* Strains Possessing *cagA* Is Associated with an  
757 Increased Risk of Developing Adenocarcinoma of the Stomach. *Cancer Res*.  
758 1995;55:2111–6.
- 759 11. Cover TL. *Helicobacter pylori* diversity and gastric cancer risk. *MBio*. 2016;7(1):1–  
760 9.



- 761 12. Olbermann P, Josenhans C, Moodley Y, Uhr M, Stamer C, Vauterin M, et al. A  
762 global overview of the genetic and functional diversity in the helicobacter pylori  
763 cag pathogenicity island. *PLoS Genet*. 2010;6(8).
- 764 13. Backert S, Brandt S, Kwok T, Hartig R, Ko W. NF- $\kappa$ B activation and potentiation  
765 of proinflammatory responses by the Helicobacter pylori CagA protein. *Proc Natl*  
766 *Acad Sci*. 2005;102(26):9300–5.
- 767 14. Barrozo RM, Cooke CL, Hansen LM, Lam AM, Gaddy JA, Johnson EM, et al.  
768 Functional Plasticity in the Type IV Secretion System of Helicobacter pylori. *PLoS*  
769 *Pathog*. 2013;9(2).
- 770 15. Barrozo RM, Hansen LM, Lam AM, Skoog EC, Martin ME, Cai LP, et al. CagY is  
771 an Immune-Sensitive Regulator of the Helicobacter pylori Type IV Secretion  
772 System. *Gastroenterology* [Internet]. 2016;(October):1–12. Available from:  
773 [http://linkinghub.elsevier.com/retrieve/pii/S001650851634954X%0Ahttp://www.nc](http://linkinghub.elsevier.com/retrieve/pii/S001650851634954X%0Ahttp://www.ncbi.nlm.nih.gov/pubmed/27569724)  
774 [bi.nlm.nih.gov/pubmed/27569724](http://www.ncbi.nlm.nih.gov/pubmed/27569724)
- 775 16. Skoog EC, Morikis VA, Martin ME, Foster GA, Cai LP, Hansen LM, et al. CagY-  
776 dependent regulation of type IV secretion in helicobacter pylori is associated with  
777 alterations in integrin binding. *MBio*. 2018;9(3):1–16.
- 778 17. Brandt S, Kwok T, Hartig R, König W, Backert S. NF- $\kappa$ B activation and  
779 potentiation of proinflammatory responses by the Helicobacter pylori CagA  
780 protein. *Proc Natl Acad Sci U S A*. 2005;102(26):9300–5.
- 781 18. Lamb A, Yang XD, Tsang YHN, Li JD, Higashi H, Hatakeyama M, et al.  
782 Helicobacter pylori CagA activates NF- $\kappa$ B by targeting TAK1 for TRAF6-mediated  
783 Lys 63 ubiquitination. *EMBO Rep* [Internet]. 2009;10(11):1242–9. Available from:

- 784 <http://dx.doi.org/10.1038/embor.2009.210>
- 785 19. Salama NR, Hartung ML, Müller A. Life in the human stomach: persistence  
786 strategies of the bacterial pathogen *Helicobacter pylori*. *Nat Rev Microbiol*  
787 [Internet]. 2013;11(6):385–99. Available from:  
788 [http://www.pubmedcentral.nih.gov/articlerender.fcgi?artid=3733401&tool=pmcentr  
790 ez&rendertype=abstract](http://www.pubmedcentral.nih.gov/articlerender.fcgi?artid=3733401&tool=pmcentr<br/>789 ez&rendertype=abstract)
- 790 20. Palframan SL, Kwok T, Gabriel K. Vacuolating cytotoxin A (VacA), a key toxin for  
791 *Helicobacter pylori* pathogenesis. *Front Cell Infect Microbiol*. 2012;2(July):92.
- 792 21. Javaheri A, Kruse T, Moonens K, Mejías-luque R, Debraekeleer A, Asche CI, et  
793 al. *Helicobacter pylori* adhesin HopQ engages in a virulence-  
794 enhancing interaction with human CEACAMs. *Nat Microbiol* [Internet].  
795 2016;2(1):1–12. Available from: <http://dx.doi.org/10.1038/nmicrobiol.2016.189>
- 796 22. Solnick J V., Hansen LM, Salama NR, Boonjakuakul JK, Syvanen M. Modification  
797 of *Helicobacter pylori* outer membrane protein expression during experimental  
798 infection of rhesus macaques. *Proc Natl Acad Sci U S A*. 2004;101(7):2106–11.
- 799 23. Danielli A, Amore G, Scarlato V. Built shallow to maintain homeostasis and  
800 persistent infection: Insight into the transcriptional regulatory network of the  
801 gastric human pathogen *Helicobacter pylori*. *PLoS Pathog*. 2010;6(6).
- 802 24. Wang G, Ge Z, Rasko DA, Taylor DE. Lewis antigens in *Helicobacter pylori*:  
803 Biosynthesis and phase variation. *Mol Microbiol*. 2000;36(6):1187–96.
- 804 25. Bergman M, Prete G Del, Kooyk Y Van, Appelmeik B. *Helicobacter pylori* phase  
805 variation , immune modulation and gastric autoimmunity. *Nat Rev Microbiol*.  
806 2006;4(February):1194–7.

- 807 26. Björkholm B, Sjölund M, Falk PG, Berg OG, Engstrand L, Andersson DI. Mutation  
808 frequency and biological cost of antibiotic resistance in *Helicobacter pylori*. Proc  
809 Natl Acad Sci U S A. 2001;98(25):14607–12.
- 810 27. Wang GE, Wilson TJM, Jiang QIN, Taylor DE, Al WET. Spontaneous Mutations  
811 That Confer Antibiotic Resistance in *Helicobacter pylori*. Antimicrob Agents  
812 Chemother. 2001;45(3):727–33.
- 813 28. Lee H, Popodi E, Tang H, Foster PL. Rate and molecular spectrum of  
814 spontaneous mutations in the bacterium *Escherichia coli* as determined by whole-  
815 genome sequencing. Proc Natl Acad Sci U S A. 2012;109(41).
- 816 29. García-Ortíz MV, Marsin S, Arana ME, Gasparutto D, Guérois R, Kunkel TA, et al.  
817 Unexpected role for *Helicobacter pylori* dna polymerase i as a source of genetic  
818 variability. PLoS Genetics. 2011;7(6):1–8.
- 819 30. Eutsey R, Wang G, Maier RJ. Role of a MutY DNA glycosylase in combating  
820 oxidative DNA damage in *Helicobacter pylori*. DNA Repair (Amst). 2007;6(1):19–  
821 26.
- 822 31. Dorer MS, Cohen IE, Sessler TH, Fero J, Salama NR. Natural competence  
823 promotes *Helicobacter pylori* chronic infection. Infect Immun. 2013;81(1):209–15.
- 824 32. Baltrus DA, Guillemin K, Phillips PC. Natural transformation increases the rate of  
825 adaptation in the human pathogen *Helicobacter pylori*. Evolution (N Y).  
826 2008;62(1):39–49.
- 827 33. Linz B, Balloux F, Moodley Y, Manica A, Liu H, Roumagnac P, et al. An African  
828 origin for the intimate association between humans and *Helicobacter pylori*.  
829 Nature. 2007;445(7130):915–8.

- 830 34. Israel DA, Salama N, Krishna U, Rieger UM, Atherton JC, Falkow S, et al.  
831 *Helicobacter pylori* genetic diversity within the gastric niche of a single human  
832 host. *Proc Natl Acad Sci U S A* [Internet]. 2001;98(25):14625–30. Available from:  
833 <http://www.pnas.org/content/98/25/14625.abstract>  
834 <http://www.pnas.org/content/98/25/14625.short>
- 835 35. Morelli G, Didelot X, Kusecek B, Schwarz S, Bahlawane C, Falush D, et al.  
836 Microevolution of *Helicobacter pylori* during prolonged infection of single hosts  
837 and within families. *PLoS Genet*. 2010;6(7):1–12.
- 838 36. Didelot X, Walker AS, Peto TE, Crook DW, Wilson DJ. Within-host evolution of  
839 bacterial pathogens. *Nat Rev Microbiol*. 2016;14(3):150–62.
- 840 37. Ailloud F, Didelot X, Woltemate S, Pfaffinger G, Overmann J, Bader RC, et al.  
841 Within-host evolution of *Helicobacter pylori* shaped by niche-specific adaptation,  
842 intragastric migrations and selective sweeps. *Nat Commun*. 2019;10(1).
- 843 38. Dunne C, Dolan B, Clyne M. Factors that mediate colonization of the human  
844 stomach by *Helicobacter pylori*. *World J Gastroenterol*. 2014;20(19):5610–24.
- 845 39. Howitt MR, Lee JY, Lertsethtakarn P, Vogelmann R, Joubert L-M, Ottemann KM,  
846 et al. ChePep Controls *Helicobacter pylori* Infection of the Gastric Glands. *MBio*.  
847 2011;2(4):1–10.
- 848 40. Keilberg D, Ottemann KM. How *Helicobacter pylori* senses, targets and interacts  
849 with the gastric epithelium. *Environ Microbiol*. 2016;18(3):791–806.
- 850 41. Amieva M, Jr RMP. Pathobiology of *Helicobacter pylori* – Induced Gastric Cancer.  
851 *Gastroenterology* [Internet]. 2016;150(1):64–78. Available from:  
852 <http://dx.doi.org/10.1053/j.gastro.2015.09.004>

- 853 42. Blanca Piazuolo PC. The Gastric Precancerous Cascade. *J Clin Exp Pathol*  
854 [Internet]. 2013;03(03):2–9. Available from: [https://www.omicsonline.org/the-](https://www.omicsonline.org/the-gastric-precancerous-cascade-2161-0681-3-147.php?aid=20275)  
855 [gastric-precancerous-cascade-2161-0681-3-147.php?aid=20275](https://www.omicsonline.org/the-gastric-precancerous-cascade-2161-0681-3-147.php?aid=20275)
- 856 43. Nilsson C, Bjo B, Skoglund A, Ba HK, Engstrand L. A Changing Gastric  
857 Environment Leads to Adaptation of Lipopolysaccharide Variants in *Helicobacter*  
858 *pylori* Populations during Colonization. *PLoS One*. 2009;4(6):1–9.
- 859 44. Salama NR, Hartung ML, Müller A. Life in the human stomach: Persistence  
860 strategies of the bacterial pathogen *Helicobacter pylori*. *Nat Rev Microbiol*  
861 [Internet]. 2013;11(6):385–99. Available from:  
862 <http://dx.doi.org/10.1038/nrmicro3016>
- 863 45. Falush D, Kraft C, Taylor NS, Correa P, Fox JG, Achtman M, et al. Recombination  
864 and mutation during long-term gastric colonization by *Helicobacter pylori*:  
865 Estimates of clock rates, recombination size, and minimal age. *Proc Natl Acad Sci*  
866 [Internet]. 2001;98(26):15056–61. Available from:  
867 <http://www.pnas.org/cgi/doi/10.1073/pnas.251396098>
- 868 46. Alm RA, Ling LL, Moir DT, King BL, Brown ED, Doig PC, et al. Genomic-  
869 sequence comparison of two unrelated isolates of the human gastric pathogen.  
870 *Nature*. 1999;397(February):176–80.
- 871 47. Krishna U, Romero-Gallo J, Suarez G, Azah A, Krezel AM, Varga MG, et al.  
872 Genetic evolution of a *helicobacter pylori* acid-sensing histidine kinase and gastric  
873 disease. *J Infect Dis*. 2016;214(4):644–8.
- 874 48. Uchiyama I, Mihara M, Nishide H, Chiba H, Kato M. MGD update 2018:  
875 Microbial genome database based on hierarchical orthology relations covering

- 876 closely related and distantly related comparisons. *Nucleic Acids Res.*  
877 2019;47(D1):D382–9.
- 878 49. Solnick J V. Dynamic Expression of the BabA Adhesin and its BabB paralog  
879 during *Helicobacter pylori* infection in Rhesus Macaques. *Infect Immun.*  
880 2017;(April).
- 881 50. Åberg A, Gideonsson P, Vallström A, Olofsson A, Öhman C, Rakhimova L, et al.  
882 A Repetitive DNA Element Regulates Expression of the *Helicobacter pylori* Sialic  
883 Acid Binding Adhesin by a Rheostat-like Mechanism. *PLoS Pathog.* 2014;10(7).
- 884 51. Hadfield J, Megill C, Bell SM, Huddleston J, Potter B, Callender C, et al.  
885 Nextstrain: real-time tracking of pathogen evolution. *Bioinformatics* [Internet].  
886 2018;2–6. Available from: [https://academic.oup.com/bioinformatics/advance-](https://academic.oup.com/bioinformatics/advance-article/doi/10.1093/bioinformatics/bty407/5001388)  
887 [article/doi/10.1093/bioinformatics/bty407/5001388](https://academic.oup.com/bioinformatics/advance-article/doi/10.1093/bioinformatics/bty407/5001388)
- 888 52. Alves JM, Prieto T, Posada D. Multiregional Tumor Trees Are Not Phylogenies.  
889 *Trends in Cancer* [Internet]. 2017;3(8):546–50. Available from:  
890 <http://dx.doi.org/10.1016/j.trecan.2017.06.004>
- 891 53. Kaplan-türköz B, Jiménez-soto LF, Dian C, Ertl C, Remaut H, Louche A.  
892 Structural insights into *Helicobacter pylori* oncoprotein CagA interaction with  $\beta$  1  
893 integrin. 2012;
- 894 54. Sycuro LK, Pincus Z, Gutierrez KD, Biboy J, Stern CA, Vollmer W, et al.  
895 Peptidoglycan crosslinking relaxation promotes *helicobacter pylori*'s helical shape  
896 and stomach colonization. *Cell* [Internet]. 2010;141(5):822–33. Available from:  
897 <http://dx.doi.org/10.1016/j.cell.2010.03.046>
- 898 55. Didelot X, Nell S, Yang I, Woltemate S, Van Der Merwe S, Suerbaum S. Genomic

- 899 evolution and transmission of *Helicobacter pylori* in two South African families.  
900 Proc Natl Acad Sci U S A. 2013;110(34):13880–5.
- 901 56. Didelot X, Wilson DJ. ClonalFrameML: Efficient Inference of Recombination in  
902 Whole Bacterial Genomes. PLoS Comput Biol. 2015;11(2):1–18.
- 903 57. Kennemann L, Didelot X, Aebischer T, Kuhn S, Drescher B, Droege M, et al.  
904 *Helicobacter pylori* genome evolution during human infection. Proc Natl Acad Sci  
905 [Internet]. 2011;108(12):5033–8. Available from:  
906 <http://www.pnas.org/cgi/doi/10.1073/pnas.1018444108>
- 907 58. Sakoparnig T, Field C, van Nimwegen E. Whole genome phylogenies reflect long-  
908 tailed distributions of recombination rates in many bacterial species. bioRxiv  
909 [Internet]. 2019;601914. Available from:  
910 <http://biorxiv.org/content/early/2019/04/07/601914.abstract>
- 911 59. Jorth P, Staudinger BJ, Wu X, Bruce JE, Timothy L, Singh PK, et al. within Cystic  
912 Fibrosis Lungs Regional Isolation Drives Bacterial Diversification within Cystic  
913 Fibrosis Lungs. Cell Host Microbe [Internet]. 2015;18(3):307–19. Available from:  
914 <http://dx.doi.org/10.1016/j.chom.2015.07.006>
- 915 60. Moyat M, Velin D. Immune responses to *Helicobacter pylori* infection. World J  
916 Gastroenterol. 2014;20(19):5583–93.
- 917 61. Martinez LE, Hardcastle JM, Wang J, Pincus Z, Hoover TR, Bansil R, et al. To  
918 Maintain Robust Motility in Viscous Environments. Mol Microbiol. 2017;99(1):88–  
919 110.
- 920 62. Martínez LE, O’Brien VP, Leverich CK, Knoblauch SE, Salamaa NR. Nonhelical  
921 *Helicobacter pylori* mutants show altered gland colonization and elicit less gastric

- 922 pathology than helical bacteria during chronic infection. *Infect Immun*.  
923 2019;87(7):1–15.
- 924 63. Lee A, O'Rourke J, De Ungria MC, Robertson B, Daskalopoulos G, Dixon MF. A  
925 standardized mouse model of *Helicobacter pylori* infection: Introducing the  
926 Sydney strain. *Gastroenterology*. 1997;112(4):1386–97.
- 927 64. Baldwin DN, Shepherd B, Kraemer P, Hall MK, Sycuro LK, Pinto-Santini DM, et  
928 al. Identification of *Helicobacter pylori* genes that contribute to stomach  
929 colonization. *Infect Immun*. 2007;75(2):1005–16.
- 930 65. Humbert O, Salama NR. The *Helicobacter pylori* HpyAXII restriction-modification  
931 system limits exogenous DNA uptake by targeting GTAC sites but shows  
932 asymmetric conservation of the DNA methyltransferase and restriction  
933 endonuclease components. *Nucleic Acids Res*. 2008;36(21):6893–906.
- 934 66. Hochberg Y. Controlling the False Discovery Rate : A Practical and Powerful  
935 Approach to Multiple Testing Author ( s ): Yoav Benjamini and Yosef Hochberg  
936 Source : *Journal of the Royal Statistical Society . Series B ( Methodological )*, Vol .  
937 57 , No . 1 ( 1995 ), Publi. 1995;57(1):289–300.
- 938 67. Barrick JE, Colburn G, Deatherage DE, Traverse CC, Strand MD, Borges JJ, et  
939 al. Identifying structural variation in haploid microbial genomes from short-read  
940 resequencing data using breseq. 2014;1–17.
- 941 68. Nei M, Li WH. Mathematical model for studying genetic variation in terms of  
942 restriction endonucleases. *Proc Natl Acad Sci U S A*. 1979;76(10):5269–73.
- 943 69. Pfeifer B, Wittelsbürger U, Ramos-Onsins SE, Lercher MJ. PopGenome: An  
944 efficient swiss army knife for population genomic analyses in R. *Mol Biol Evol*.



- 945           2014;31(7):1929–36.
- 946   70.   Quinlan AR, Hall IM. BEDTools: A flexible suite of utilities for comparing genomic  
947           features. *Bioinformatics*. 2010;26(6):841–2.
- 948   71.   Dixit PD, Pang TY, Studier FW, Maslov S. Recombinant transfer in the basic  
949           genome of *Escherichia coli*. *Proc Natl Acad Sci U S A*. 2015;112(29):9070–5.
- 950   72.   Copass M, Grandi G, Rappuoli R. Introduction of unmarked mutations in the  
951           *Helicobacter pylori vacA* gene with a sucrose sensitivity marker. *Infect Immun*.  
952           1997;65(5):1949–52.
- 953   73.   Wang Y, Taylor DE. Chloramphenicol resistance in *Campylobacter coli*:  
954           nucleotide sequence, expression, and cloning vector construction. *Gene*.  
955           1990;94(1):23–8.
- 956   74.   Amundsen SK, Fero J, Salama NR, Smith GR. Dual nuclease and helicase  
957           activities *Helicobacter pylori* AddAB are required for DNA repair, recombination,  
958           and mouse infectivity. *J Biol Chem*. 2009;284(25):16759–66.
- 959   75.   Hatakeyama M. Structure and function of *Helicobacter pylori* CagA, the first-  
960           identified bacterial protein involved in human cancer. *Proc Japan Acad Ser B*.  
961           2017;93(4):196–219.
- 962
- 963

964 **Supplementary Information**

965

966 Tables and Datasets

967

968 **Table S1. A total of 2,232 unique SNPs and 573 indels were detected in the**

969 **collection of 39 isolates.** For each of the 2,232 unique SNPs (**A**) and 573 indels (**B**),

970 the tables indicate the nucleotide (nt) position and gene ID according to the reference

971 (J99, AE001439). Unique events are labeled as either coding or intergenic. SNPs within

972 coding regions are further subdivided into nonsynonymous or synonymous categories.

973 The presence or absence of each mutation across each individual isolate is designated

974 as present (1) or absent (0) along with the total number of isolates with the mutation (n).

975

976 **Table S2a-b. Cell Envelope proteins have excess accumulation of nSNPs.**

977 Contingency tables of nSNPs falling within and outside each of the 15 MGDB class

978 categories compared to expected values based on a normal distribution. Significance

979 was determined using a Fisher's exact test. Raw and false discovery rate corrected p-

980 values are reported with p-values <0.05 considered significant. (**A**) Contingency table

981 values for total dataset and (**B**) values unique to recent isolates.

982 **Table S3. Total number and enrichment or depletion of nSNPs detected across all**

983 **genes.** All 1495 annotated genes in the J99 reference (AE001439) are reported with the

984 number of within-host nSNPs detected (n=536 across all genes). Relative z-scores

985 displayed in the table were calculated from weighted values based on gene length.

986 **Table S4a-d. Individual SNPs and indels associated with antrum or corpus were**

987 **not detected in this individual.** Nucleotide positions of SNP or indel unique to recent

988 isolates are reported with contingency tables showing number of isolates from corpus  
989 and antrum with and without that mutation as compared to isolates outside that region.  
990 Statistical significance was determined with a Fisher's exact test. Raw and false  
991 discovery rate corrected p-values are reported with p-values <0.05 considered  
992 statistically significant. **(A)** Table of recent SNPs (n=1,379) unique to corpus isolates  
993 (corpus, n=12) compared to isolates originating from other biopsy sites (other, n=15). **(B)**  
994 Table of recent SNPs (n=1,379) unique to antrum isolates (antrum, n=12) compared to  
995 isolates originating from other biopsy sites (other, n=15). **(C)** Table of recent indels  
996 (n=372) unique to corpus isolates (corpus, n=12) compared to isolates originating from  
997 other biopsy sites (other, n=15). **(D)** Table of recent indels (n=372) unique to antrum  
998 isolates (antrum, n=12) compared to isolates originating from other biopsy sites (other,  
999 n=15).

1000

1001 **Table S5. Pairwise comparison data used in Figures 2, 4, 5, and 7.** Genetic  
1002 distance, shared sites,  $\pi$  values, and time between isolation for each unique pairwise  
1003 comparison of isolates reported in this study. For comparisons between time point, only  
1004 antral isolates were used.

1005 **Table S6. Primers used in this study.** List of primer sequences used in this study for  
1006 sequencing and strain construction.

1007

1008

1009

**Table S7. Strains used in this study.**

| <b>Strains</b>                | <b>Description</b>                                    | <b>Reference</b> |
|-------------------------------|-------------------------------------------------------|------------------|
| <i>J99 ΔcagY</i>              | J99 with catsacB cassette at <i>cagY</i> native locus | This work        |
| <i>J99 cagY<sub>D1</sub></i>  | J99 with D1 <i>cagY</i> allele at native locus        | This work        |
| <i>J99 cagY<sub>SC4</sub></i> | J99 with SC4 <i>cagY</i> allele at native locus       | This work        |
| <i>J99 ΔcagA</i>              | J99 with catsacB cassette at <i>cagA</i> native locus | This work        |
| <i>J99 cagA<sub>D1</sub></i>  | J99 with D1 <i>cagA</i> allele at native locus        | This work        |
| <i>J99 ΔcagE</i>              | J99 with catsacB cassette at <i>cagE</i> native locus | This work        |

1010

1011

1012

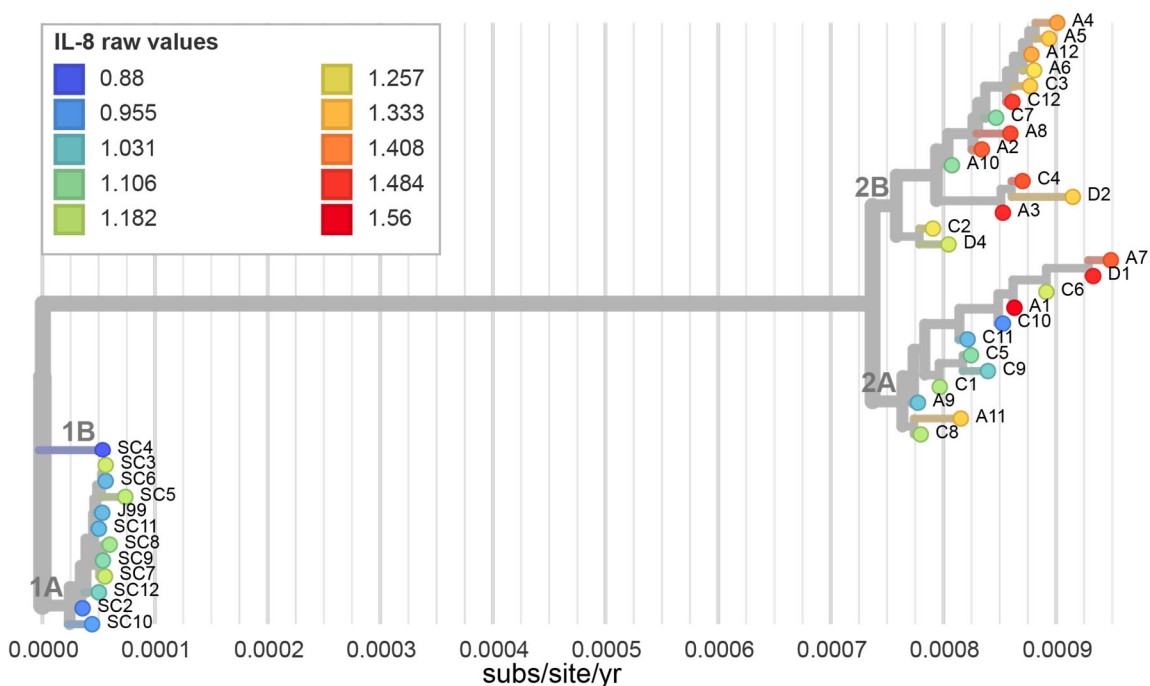

**Figure S1. Proinflammatory cytokine induction during AGS cell co-culture**

**varies between isolates.** Isolate dendrogram overlaid with inflammatory cytokine, IL-8, secretion phenotype after 24 hours of co-culture (MOI=10) with gastric epithelial cell line (AGS). Leaf colors represent normalized IL-8 induction relative to ancestral isolate J99 for each isolate as shown in the figure legend.

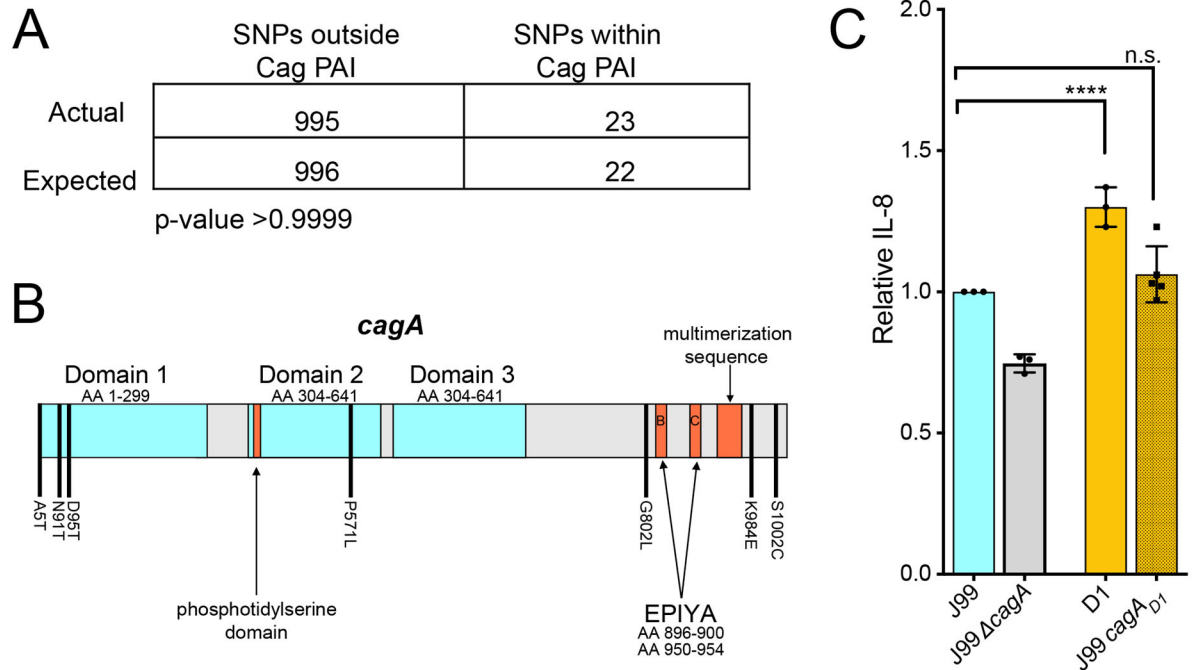

1022  
1023  
1024

**Figure S2. Genetic variation in *cagA* does not influence IL-8 induction during**

1025

**AGS cell co-culture. (A)** Contingency table of nSNPs falling within and outside Cag

1026

PAI compared to expected values based on a normal distribution. Significance was

1027

determined using a Fisher's exact test. **(B)** CagA gene schematic labeled with

1028

nonsynonymous amino acid changes shared by all recent isolates (black bars). The

1029

three protein domains identified in the published crystal structure (blue), including

1030

the flexible N-terminal region (Domain I, amino acids 1-299), the anti-parallel beta

1031

sheet (Domain II, amino acids 304-641), and the (Domain III, amino acids 304-641)

1032

are labeled. Known host protein interaction motifs including the integrin binding

1033

phosphotyrosine domain, phosphotyrosine EPIYA sites, and multimerization

1034

sequence are also labeled in orange [75]. **(C)** Levels of IL-8 produced by *cagA* allelic

1035

exchange strains relative to J99 24 hrs post infection of AGS cells (MOI=10). Data

1036

points represent averaged values from triplicate wells from at least 3 independent

1037 biological replicates. Significance was determined with a one-way ANOVA with

1038 Dunnett's corrections (n.s., not significant; \*\*\*\* p<0.0001).

1039

1040

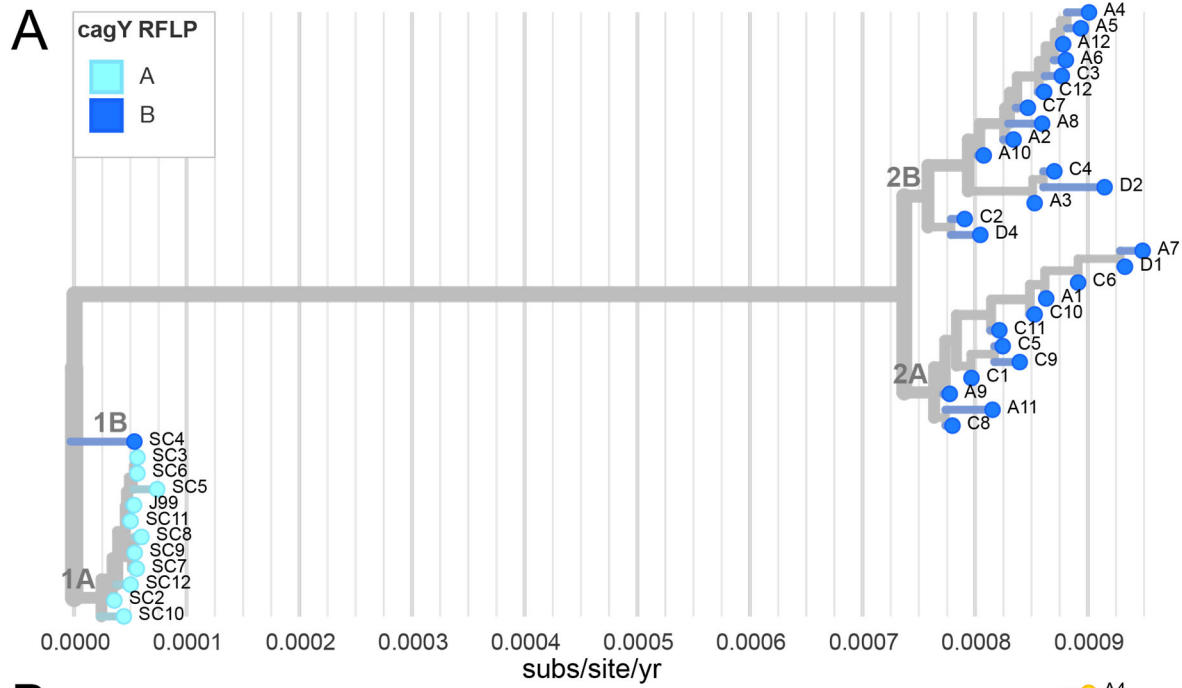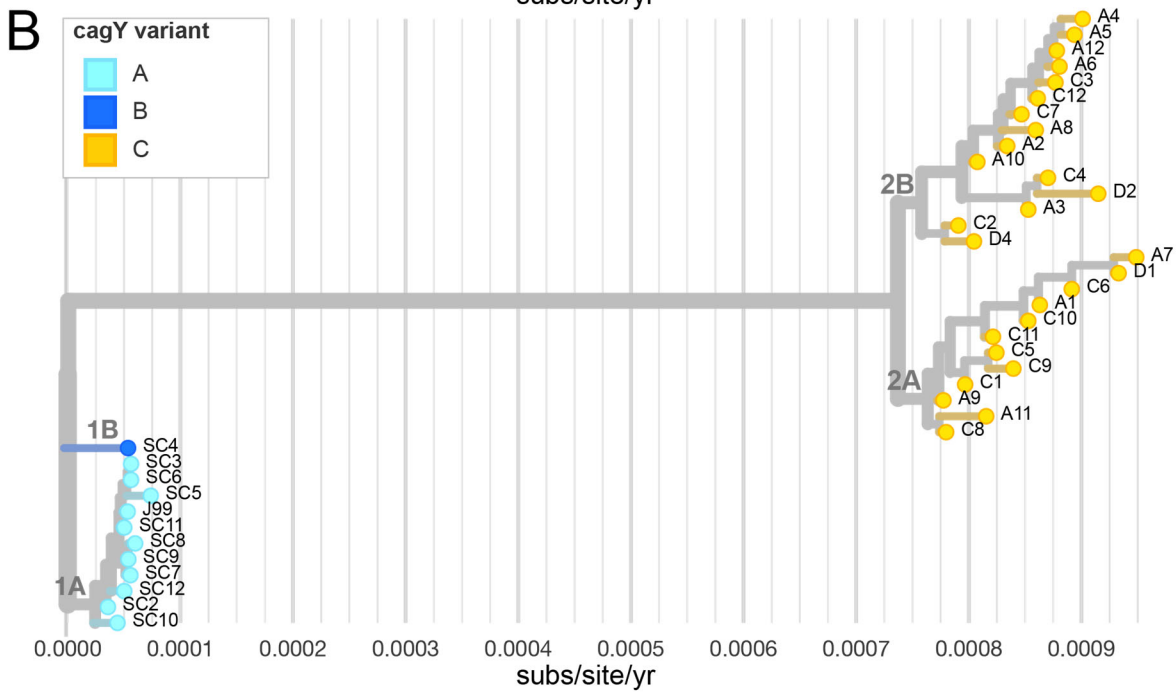

1041



C

```
J99 630 KKECEKLLTPEAKKKLEEAKKSVRAYLDCVSKAKNEAERKECEKLLTPEAKKLLLENQALD
SC4 630 KKECEKLLTPEAKKKLEEAKKSVRAYLDCVSKAKNEAERKECEKLLTPEAKKLLLENQALD
D1 630 KKECEKLLTPEAKKKLEEAKKSVRAYLDCVSKAKNEAERKECEKLLTPEAKKLLLENQALD

J99 690 CLKNAKTDEERKECKDLPKDLQKKVLAKESVRVYLDVSKAKNEAERKECEKLLTPEAR
SC4 690 CLKNAKTDEERKECKDLPKDLQKKVLAKESVKA YLDVSKAKNEAERKECEKLLTPEAR
D1 690 CLKNAKTDEERKECKDLPKDLQKKVLAKESVRVYLDVSKAKNEAERKECEKLLTPEAR

J99 750 KLEEAKKSVKAYKDCVLRARNEKEKQECEKLLTPEARKLLEESKKS VKAYLDCVSKAKN
SC4 750 KLEEAKKSVKAYKDCVSRARNEKEKQECEKLLTPEARKLLEESKKS VKAYLDCVSKAKN
D1 750 KLEEAKKSVKAYKDCVSRARNEKEKQECEKLLTPEARKLLEESKKS VKAYLDCVSKAKN

J99 810 EAERKECEKLLTPEARKLLEEAKESVKAYKDCVSRARNEKEKQECEKLLTPEARKLLENQ
SC4 810 EAERKECEKLLTPEARKLLEEAKESVKAYKDCVSRARNEKEKQECEKLLTPEARKLLENQ
D1 810 EAERKECEKLLTPEARKLLEEAKESVKAYKDCVSRARNEKEKQECEKLLTPEARKLLENQ

J99 870 ALDCLKNAKTEAEKKRCVKDLPKDLQKKVLAKESVRVYLDVSKAKNEAERKECEKLLTP
SC4 870 ALDCLKNAKTEAEKKRCVKDLPKDLQKKVLAKESVRVYLDVSKAKNEAERKECEKLLTP
D1 870 ALDCLKNAKTEAEKKRCVKDLPKDLQKKVLAKESVRVYLDVSRARNEKEKKECEKLLTP

J99 930 EARKLLEEAKESVKAYKDCVSRARNEKEKQECEKLLTPEARKLLEQEVKKS VKAYLDCV
SC4 930 EARKLLEEAKESVKAYKDCVSRARNEKEKQECEKLLTPEARKLLEQEVKKS VKAYLDCV
D1 930 EARKLLEESKESVKAYKDCVSRARNEKEKQECEKLLTPEARKLLEQEVKKS VKAYLDCV

J99 990 RARNEKEKQECEKLLTPEARKLLENQALDCLKNAKTEAEKKRCVKDLPKDLQKKVLAKES
SC4 990 RARNEKEKQECEKLLTPEARKLLENQALDCLKNAKTEAEKKRCVKDLPKDLQKKVLAKES
D1 990 RARNEKEKQECEKLLTPEARKLLENQALDCLKNAKTEAEKKRCVKDLPKDLQKKVLAKES
```

1042 **Figure S3. Three different *cagY* alleles distinguish isolate groups and subgroups.**

1043 **(A)** Isolate dendrogram overlaid with two different *cagY* RFLP subtypes detected with  
1044 restriction enzyme DdeI. RFLP subtypes, named A and B according to the figure  
1045 legend, are shown in Fig. 6a. **(B)** Isolate dendrogram overlaid with unique *cagY* alleles  
1046 detected with Sanger sequencing. Leaf colors correspond to each of the three unique  
1047 alleles detected and reported in Fig. 6b. Group 1A shares allele A, group 1B shares  
1048 allele B, and groups 2A and 2B share allele C. **(C)** Amino acid alignment of multiple  
1049 repeat regions of three representative *cagY* alleles detected in the collection. J99  
1050 represents the allele found in subgroup 1A (allele A), SC4 represents the allele found in  
1051

1052 subgroup 1B (allele B), and D1 represents the allele found in 2A and 2B (allele C).  
1053 Polymorphic sites are highlighted with amino acids in blue representing the reference  
1054 (J99, AE001439) and red indicating a nonsynonymous substitution.  
1055

1056

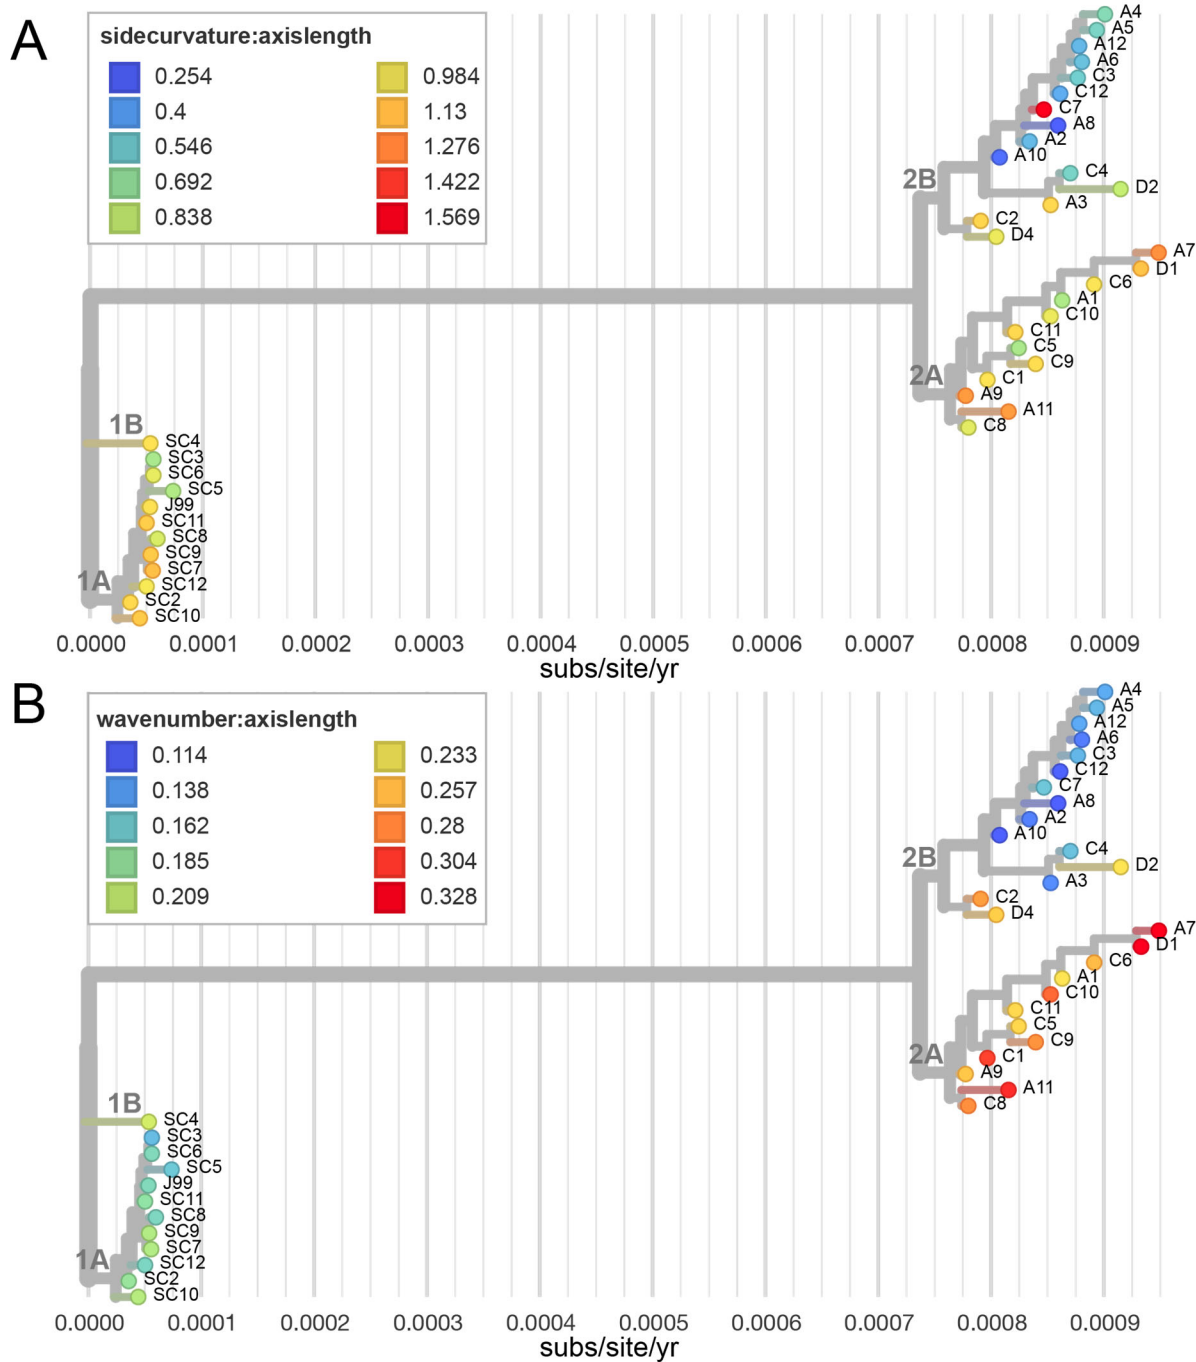

1057

1058

**Figure S4. Cell shape parameters vary within and between isolate subgroups.**

1059

Isolate dendrogram overlaid with cell shape measurements taken from 2-D phase

1060

contrast images using CellTool. Leaf colors represent side curvature normalized by

1061 centerline axis length ratios (**A**) or wave number normalized by centerline axis length

1062 (**B**) as indicated in the figure legends.

1063

1064

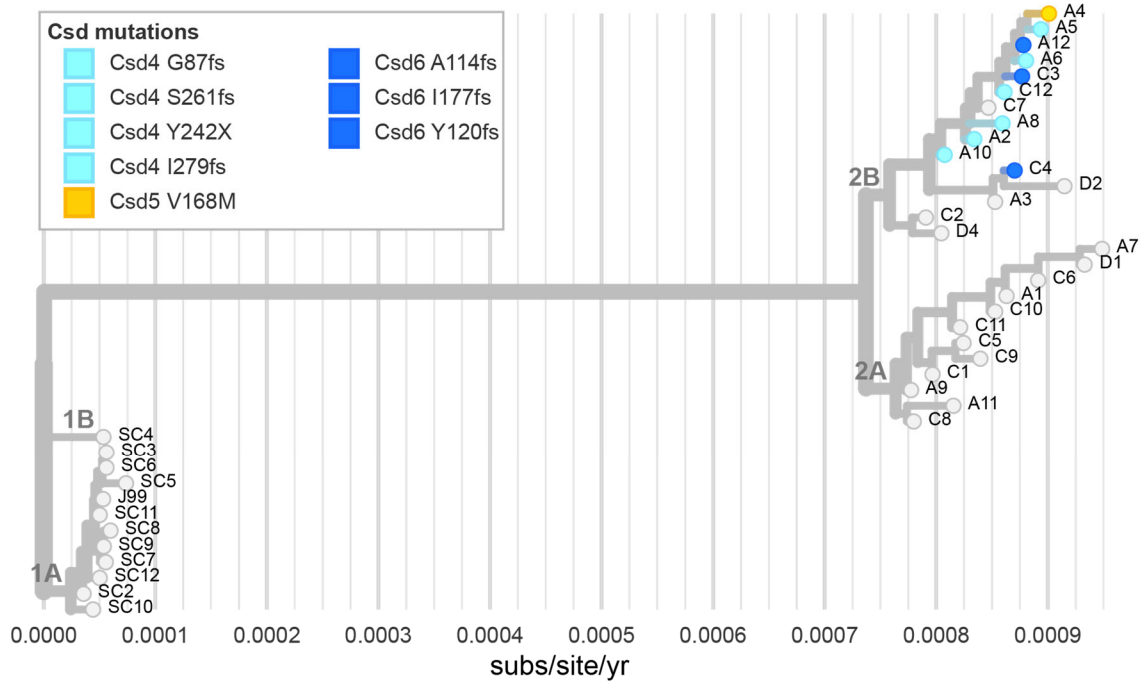

**Figure S5. Mutations in *csd* genes are confined to isolate subgroup 2B.** Isolate dendrogram labeled with putative loss of function mutations in cell shape determining genes (*csd*). Leaf colors indicate mutations in *csd4* (light blue), *csd5* (yellow), *csd6* (dark blue) listed in the figure legend with amino acid mutations. All isolates that have retained helical shape are in gray.
